# Supplementary material for: Non-Publication Is Common among Phase 1, Single-Center, Not Prospectively Registered, or Early Terminated Clinical Drug Trials
Source: PubMed Central journal article supplement (PMC5156378; doi:10.1371/journal.pone.0167709), 2016-12-14
Supplement: pone.0167709.s006.pdf [file pone.0167709.s006.pdf]

# Codebook

## Notes

|                |                                                                                                                                                                                                                                                                                                                                                                                                                                                                                                                                                                                                                                                                                                                                                                                                                                                                                                                                                                             |                                                                                                                                                                     |
|----------------|-----------------------------------------------------------------------------------------------------------------------------------------------------------------------------------------------------------------------------------------------------------------------------------------------------------------------------------------------------------------------------------------------------------------------------------------------------------------------------------------------------------------------------------------------------------------------------------------------------------------------------------------------------------------------------------------------------------------------------------------------------------------------------------------------------------------------------------------------------------------------------------------------------------------------------------------------------------------------------|---------------------------------------------------------------------------------------------------------------------------------------------------------------------|
| Output Created | 24-AUG-2016 15:06:52                                                                                                                                                                                                                                                                                                                                                                                                                                                                                                                                                                                                                                                                                                                                                                                                                                                                                                                                                        |                                                                                                                                                                     |
| Comments       |                                                                                                                                                                                                                                                                                                                                                                                                                                                                                                                                                                                                                                                                                                                                                                                                                                                                                                                                                                             |                                                                                                                                                                     |
| Input          | Data                                                                                                                                                                                                                                                                                                                                                                                                                                                                                                                                                                                                                                                                                                                                                                                                                                                                                                                                                                        | G:\PhD\CCMO\Study<br>publications\Submission Plos<br>One\Dataset\Data for sharing\SPSS<br>Toetsing online export cohort<br>2007_for publication_anonymousID.<br>sav |
|                | Active Dataset                                                                                                                                                                                                                                                                                                                                                                                                                                                                                                                                                                                                                                                                                                                                                                                                                                                                                                                                                              | DataSet1                                                                                                                                                            |
|                | Filter                                                                                                                                                                                                                                                                                                                                                                                                                                                                                                                                                                                                                                                                                                                                                                                                                                                                                                                                                                      | <none>                                                                                                                                                              |
|                | Weight                                                                                                                                                                                                                                                                                                                                                                                                                                                                                                                                                                                                                                                                                                                                                                                                                                                                                                                                                                      | <none>                                                                                                                                                              |
|                | Split File                                                                                                                                                                                                                                                                                                                                                                                                                                                                                                                                                                                                                                                                                                                                                                                                                                                                                                                                                                  | <none>                                                                                                                                                              |
|                | N of Rows in Working Data<br>File                                                                                                                                                                                                                                                                                                                                                                                                                                                                                                                                                                                                                                                                                                                                                                                                                                                                                                                                           | 574                                                                                                                                                                 |
| Syntax         | CODEBOOK<br>Dossier_ID_anonymized [n]<br>Survey_response [n]<br>Prospective_registration [n]<br>Prospective_registration_1year [n]<br>Prospective_registration_0days [n]<br>Registration_atall [n]<br>PhaseofStudyPhase1_dich [n]<br>PhaseofStudy [n] SponsorType [n]<br>CROinvolved [n]<br><br>DrugCategory_RegularvsOther_dich<br>[n] CentersInvolved [n]<br>TherapeuticEffectExpected_dich [n]<br>TypeofStudy [n]<br>ParticipantCategory_dich [n]<br>ProductRegisteredinNL [n]<br>TherapeuticArea_ICD10 [n]<br>TherapeuticArea_Oncology [n]<br>Prematureending_short [n]<br>Prospective_registration_dich [n]<br>ResultsRegistry [n]<br>Prematureendingofthetrial_complete<br>[n] Outcome_positive_negative [n]<br>EventDate<br>[n] TimeToEvent [s]<br>PublishedasArticle [n]<br>/VARINFO POSITION LABEL<br>TYPE FORMAT MEASURE ROLE<br>VALUELABELS MISSING<br>ATTRIBUTES<br>/OPTIONS VARORDER=VARLIST<br>SORT=ASCENDING<br>MAXCATS=200<br>/STATISTICS COUNT PERCENT ... |                                                                                                                                                                     |
| Resources      | Processor Time                                                                                                                                                                                                                                                                                                                                                                                                                                                                                                                                                                                                                                                                                                                                                                                                                                                                                                                                                              | 00:00:00,06                                                                                                                                                         |
|                | Elapsed Time                                                                                                                                                                                                                                                                                                                                                                                                                                                                                                                                                                                                                                                                                                                                                                                                                                                                                                                                                                | 00:00:00,23                                                                                                                                                         |

**Survey\_response**

|                     |             | Value                                                       | Count | Percent |
|---------------------|-------------|-------------------------------------------------------------|-------|---------|
| Standard Attributes | Position    | 2                                                           |       |         |
|                     | Label       | Response to questionnaire                                   |       |         |
|                     | Type        | Numeric                                                     |       |         |
|                     | Format      | F8                                                          |       |         |
|                     | Measurement | Nominal                                                     |       |         |
|                     | Role        | Input                                                       |       |         |
| Valid Values        | 1           | Response                                                    | 181   | 31,5%   |
|                     | 2           | Willing to participate, but unable to track the information | 20    | 3,5%    |
|                     | 3           | Refused to participate                                      | 6     | 1,0%    |
|                     | 4           | No response                                                 | 359   | 62,5%   |
|                     | 5           | Requested information sent, but not correct                 | 8     | 1,4%    |

**Prospective\_registration**

|                     |             | Value                                                                   | Count | Percent |
|---------------------|-------------|-------------------------------------------------------------------------|-------|---------|
| Standard Attributes | Position    | 3                                                                       |       |         |
|                     | Label       | Was the trial prospectively registered in clinicaltrials.gov or ISRCTN? |       |         |
|                     | Type        | Numeric                                                                 |       |         |
|                     | Format      | F8                                                                      |       |         |
|                     | Measurement | Nominal                                                                 |       |         |
|                     | Role        | Input                                                                   |       |         |
| Valid Values        | 1           | Registered 1 month or more before IRB-approval                          | 215   | 37,5%   |
|                     | 2           | Registered less than 1 month before IRB-approval                        | 106   | 18,5%   |
|                     | 3           | Not registered                                                          | 253   | 44,1%   |

**Prospective\_registration\_1year**

|                     |             | Value                                      | Count | Percent |
|---------------------|-------------|--------------------------------------------|-------|---------|
| Standard Attributes | Position    | 4                                          |       |         |
|                     | Label       | Registration within 1 year of IRB-approval |       |         |
|                     | Type        | Numeric                                    |       |         |
|                     | Format      | F8                                         |       |         |
|                     | Measurement | Nominal                                    |       |         |
|                     | Role        | Input                                      |       |         |
| Valid Values        | 1           | within one year                            | 297   | 51,7%   |
|                     | 2           | no or after one year                       | 277   | 48,3%   |

**Prospective\_registration\_0days**

|                     |             | Value                                    | Count | Percent |
|---------------------|-------------|------------------------------------------|-------|---------|
| Standard Attributes | Position    | 5                                        |       |         |
|                     | Label       | Registration at same day of IRB-approval |       |         |
|                     | Type        | Numeric                                  |       |         |
|                     | Format      | F8                                       |       |         |
|                     | Measurement | Nominal                                  |       |         |
|                     | Role        | Input                                    |       |         |
| Valid Values        | 1           | Same day                                 | 178   | 31,0%   |
|                     | 2           | Not or later                             | 396   | 69,0%   |

**Registration\_atall**

|                     |             | Value                                                 | Count | Percent |
|---------------------|-------------|-------------------------------------------------------|-------|---------|
| Standard Attributes | Position    | 6                                                     |       |         |
|                     | Label       | Registered or not (regardless timing of registration) |       |         |
|                     | Type        | Numeric                                               |       |         |
|                     | Format      | F8                                                    |       |         |
|                     | Measurement | Nominal                                               |       |         |
|                     | Role        | Input                                                 |       |         |
| Valid Values        | 1           | Registered                                            | 321   | 55,9%   |
|                     | 2           | Not registered                                        | 253   | 44,1%   |

**PhaseofStudyPhase1\_dich**

|                     |             | Value            | Count | Percent |
|---------------------|-------------|------------------|-------|---------|
| Standard Attributes | Position    | 7                |       |         |
|                     | Label       | Phase 1 or other |       |         |
|                     | Type        | Numeric          |       |         |
|                     | Format      | F8               |       |         |
|                     | Measurement | Nominal          |       |         |
|                     | Role        | Input            |       |         |
| Valid Values        | 1           | Phase 1          | 119   | 20,7%   |
|                     | 2           | Other phase      | 455   | 79,3%   |

**PhaseofStudy**

|                     |             | Value          | Count | Percent |
|---------------------|-------------|----------------|-------|---------|
| Standard Attributes | Position    | 8              |       |         |
|                     | Label       | Phase of Study |       |         |
|                     | Type        | Numeric        |       |         |
|                     | Format      | F8             |       |         |
|                     | Measurement | Nominal        |       |         |
|                     | Role        | Input          |       |         |
| Valid Values        | 1           | Phase I        | 119   | 20,7%   |
|                     | 2           | Phase II       | 130   | 22,6%   |
|                     | 3           | Phase III      | 172   | 30,0%   |
|                     | 4           | Phase IV       | 57    | 9,9%    |
|                     | 5           | Other          | 96    | 16,7%   |
|                     | 6           | Not applicable | 0     | 0,0%    |

**SponsorType**

|                     |             | Value                                       | Count | Percent |
|---------------------|-------------|---------------------------------------------|-------|---------|
| Standard Attributes | Position    | 9                                           |       |         |
|                     | Label       | Type sponsor                                |       |         |
|                     | Type        | Numeric                                     |       |         |
|                     | Format      | F8                                          |       |         |
|                     | Measurement | Nominal                                     |       |         |
|                     | Role        | Input                                       |       |         |
| Valid Values        | 1           | Pharmaceutical industry                     | 352   | 61,3%   |
|                     | 2           | Investigator (industry (co-) funded)        | 71    | 12,4%   |
|                     | 3           | Investigator (no industry funding involved) | 151   | 26,3%   |

**CROinvolved**

|                     |             | Value                           | Count | Percent |
|---------------------|-------------|---------------------------------|-------|---------|
| Standard Attributes | Position    | 10                              |       |         |
|                     | Label       | Is a CRO involved in the study? |       |         |
|                     | Type        | Numeric                         |       |         |
|                     | Format      | F8                              |       |         |
|                     | Measurement | Nominal                         |       |         |
|                     | Role        | Input                           |       |         |
| Valid Values        | 1           | CRO involved                    | 214   | 37,3%   |
|                     | 2           | No CRO involved                 | 360   | 62,7%   |

**DrugCategory\_RegularvsOther\_dich**

|                     |             | Value                                                                                                      | Count | Percent |
|---------------------|-------------|------------------------------------------------------------------------------------------------------------|-------|---------|
| Standard Attributes | Position    | 11                                                                                                         |       |         |
|                     | Label       | Drug in regular or special category                                                                        |       |         |
|                     | Type        | Numeric                                                                                                    |       |         |
|                     | Format      | F8                                                                                                         |       |         |
|                     | Measurement | Nominal                                                                                                    |       |         |
|                     | Role        | Input                                                                                                      |       |         |
| Valid Values        | 1           | Regular medicine (chemical entity or regular large molecule)                                               | 549   | 95,6%   |
|                     | 2           | Other product category involved (vaccine; radiopharmaceutic; somatic cell, genetic, RNA, or other therapy) | 25    | 4,4%    |

**CentersInvolved**

|                     |             | Value                                               | Count | Percent |
|---------------------|-------------|-----------------------------------------------------|-------|---------|
| Standard Attributes | Position    | 12                                                  |       |         |
|                     | Label       | One or more Centers Involved                        |       |         |
|                     | Type        | Numeric                                             |       |         |
|                     | Format      | F8                                                  |       |         |
|                     | Measurement | Nominal                                             |       |         |
|                     | Role        | Input                                               |       |         |
| Valid Values        | 1           | Single center                                       | 249   | 43,4%   |
|                     | 2           | Multicenter, only in the Netherlands                | 54    | 9,4%    |
|                     | 3           | Multicenter, only within the EU                     | 82    | 14,3%   |
|                     | 4           | Multicenter, in the Netherlands and also outside EU | 189   | 32,9%   |

**TherapeuticEffectExpected\_dich**

|                     |             | Value                          | Count | Percent |
|---------------------|-------------|--------------------------------|-------|---------|
| Standard Attributes | Position    | 13                             |       |         |
|                     | Label       | Therapeutic effect expected    |       |         |
|                     | Type        | Numeric                        |       |         |
|                     | Format      | F8                             |       |         |
|                     | Measurement | Nominal                        |       |         |
|                     | Role        | Input                          |       |         |
| Valid Values        | 1           | Therapeutic effect expected    | 356   | 62,0%   |
|                     | 2           | No therapeutic effect expected | 218   | 38,0%   |

**TypeofStudy**

|                     |             | Value                                     | Count | Percent |
|---------------------|-------------|-------------------------------------------|-------|---------|
| Standard Attributes | Position    | 14                                        |       |         |
|                     | Label       | Intervention or (invasive-) observational |       |         |
|                     | Type        | Numeric                                   |       |         |
|                     | Format      | F8                                        |       |         |
|                     | Measurement | Nominal                                   |       |         |
|                     | Role        | Input                                     |       |         |
| Valid Values        | 1           | Intervention                              | 517   | 90,1%   |
|                     | 2           | Invasive observational                    | 45    | 7,8%    |
|                     | 3           | Non-invasive observational                | 12    | 2,1%    |

**ParticipantCategory\_dich**

|                     |             | Value                               | Count | Percent |
|---------------------|-------------|-------------------------------------|-------|---------|
| Standard Attributes | Position    | 15                                  |       |         |
|                     | Label       | Participant category                |       |         |
|                     | Type        | Numeric                             |       |         |
|                     | Format      | F8                                  |       |         |
|                     | Measurement | Nominal                             |       |         |
|                     | Role        | Input                               |       |         |
| Valid Values        | 1           | Adults and mentally capacitated     | 532   | 92,7%   |
|                     | 2           | Minor and/or mentally incapacitated | 42    | 7,3%    |

**ProductRegisteredinNL**

|                     |             | Value                                                          | Count | Percent |
|---------------------|-------------|----------------------------------------------------------------|-------|---------|
| Standard Attributes | Position    | 16                                                             |       |         |
|                     | Label       | Registration status of drugs in study                          |       |         |
|                     | Type        | Numeric                                                        |       |         |
|                     | Format      | F8                                                             |       |         |
|                     | Measurement | Nominal                                                        |       |         |
|                     | Role        | Input                                                          |       |         |
| Valid Values        | 1           | At least 1 unregistered drug in study                          | 306   | 53,3%   |
|                     | 2           | All drugs are registered, at least one used outside indication | 147   | 25,6%   |
|                     | 3           | All drugs are registered and used within indication            | 121   | 21,1%   |
|                     | 4           | No registration status indicated                               | 0     | 0,0%    |



**TherapeuticArea\_ICD10**

|                     |             | Value                          | Count | Percent |
|---------------------|-------------|--------------------------------|-------|---------|
| Standard Attributes | Position    | 17                             |       |         |
|                     | Label       | Therapeutic area ICD-10        |       |         |
|                     | Type        | Numeric                        |       |         |
|                     | Format      | F8                             |       |         |
|                     | Measurement | Nominal                        |       |         |
|                     | Role        | Input                          |       |         |
| Valid Values        | 1           | Oncology                       | 113   | 19,7%   |
|                     | 2           | Diseases of the nervous system | 72    | 12,5%   |

TherapeuticArea\_ICD10

|    | Value                                                                                            | Count | Percent |
|----|--------------------------------------------------------------------------------------------------|-------|---------|
| 3  | Endocrine, nutritional and metabolic diseases                                                    | 58    | 10,1%   |
| 4  | Diseases of the circulatory system                                                               | 62    | 10,8%   |
| 5  | Mental and behavioral disorders                                                                  | 37    | 6,4%    |
| 6  | Certain infectious and parasitic diseases                                                        | 42    | 7,3%    |
| 7  | Diseases of the blood and blood-forming organs and certain disorders involving the immune system | 34    | 5,9%    |
| 8  | Diseases of the respiratory system                                                               | 34    | 5,9%    |
| 9  | Diseases of the musculoskeletal system and connective tissue                                     | 31    | 5,4%    |
| 10 | Diseases of the digestive system                                                                 | 25    | 4,4%    |
| 11 | Diseases of the genitourinary system                                                             | 25    | 4,4%    |
| 12 | Other therapeutic areas                                                                          | 41    | 7,1%    |

**TherapeuticArea\_Oncology**

|                     |              | Value                              | Count    | Percent |
|---------------------|--------------|------------------------------------|----------|---------|
| Standard Attributes | Position     | 18                                 |          |         |
|                     | Label        | Oncology or other therapeutic area |          |         |
|                     | Type         | Numeric                            |          |         |
|                     | Format       | F8                                 |          |         |
|                     | Measurement  | Nominal                            |          |         |
|                     | Role         | Input                              |          |         |
|                     | Valid Values | 1                                  | Oncology | 113     |
|                     | 2            | No oncology                        | 461      | 80,3%   |

**Prematureending\_short**

|                     |              | Value             | Count | Percent |
|---------------------|--------------|-------------------|-------|---------|
| Standard Attributes | Position     | 19                |       |         |
|                     | Label        | Prematurely ended |       |         |
|                     | Type         | Numeric           |       |         |
|                     | Format       | F8                |       |         |
|                     | Measurement  | Nominal           |       |         |
|                     | Role         | Input             |       |         |
|                     | Valid Values | 1                 | Yes   | 102     |
|                     | 2            | No                | 472   | 82,2%   |
| Missing Values      | 3            | Unknown           | 0     | 0,0%    |

**Prospective\_registration\_dich**

|                     |              | Value                              | Count | Percent |
|---------------------|--------------|------------------------------------|-------|---------|
| Standard Attributes | Position     | 20                                 |       |         |
|                     | Label        | Trial was prospectively registered |       |         |
|                     | Type         | Numeric                            |       |         |
|                     | Format       | F9                                 |       |         |
|                     | Measurement  | Nominal                            |       |         |
|                     | Role         | Input                              |       |         |
|                     | Valid Values | 1                                  | Yes   | 215     |
|                     | 2            | No                                 | 359   | 62,5%   |

**ResultsRegistry**

|                     |             | Value                                              | Count | Percent |
|---------------------|-------------|----------------------------------------------------|-------|---------|
| Standard Attributes | Position    | 21                                                 |       |         |
|                     | Label       | Was a summary of results uploaded in the registry? |       |         |
|                     | Type        | Numeric                                            |       |         |
|                     | Format      | F3                                                 |       |         |
|                     | Measurement | Nominal                                            |       |         |
|                     | Role        | Input                                              |       |         |
| Valid Values        | 1           | Yes                                                | 136   | 23,7%   |
|                     | 2           | No                                                 | 438   | 76,3%   |

**Prematureendingofthetrial\_complete**

|                     |                            | Value             | Count | Percent |
|---------------------|----------------------------|-------------------|-------|---------|
| Standard Attributes | Position                   | 22                |       |         |
|                     | Label                      | Stage of progress |       |         |
|                     | Type                       | String            |       |         |
|                     | Format                     | A26               |       |         |
|                     | Measurement                | Nominal           |       |         |
|                     | Role                       | Input             |       |         |
| Valid Values        | Any follow-up unknown      |                   | 22    | 3,8%    |
|                     | No                         |                   | 360   | 62,7%   |
|                     | Started, follow-up unknown |                   | 90    | 15,7%   |
|                     | Yes                        |                   | 102   | 17,8%   |

**Outcome\_positive\_negative**

|                     |             | Value                            | Count | Percent |
|---------------------|-------------|----------------------------------|-------|---------|
| Standard Attributes | Position    | 23                               |       |         |
|                     | Label       | Direction of result of the trial |       |         |
|                     | Type        | Numeric                          |       |         |
|                     | Format      | F12                              |       |         |
|                     | Measurement | Nominal                          |       |         |
|                     | Role        | Input                            |       |         |
| Valid Values        | 1           | Positive                         | 146   | 25,4%   |
|                     | 2           | Negative                         | 65    | 11,3%   |
|                     | 3           | Descriptive/exploratory          | 146   | 25,4%   |
|                     | 4           | No information                   | 217   | 37,8%   |

**EventDate**

|                     |             | Value   |
|---------------------|-------------|---------|
| Standard Attributes | Position    | 24      |
|                     | Label       | <none>  |
|                     | Type        | Numeric |
|                     | Format      | EDATE10 |
|                     | Measurement | Nominal |
|                     | Role        | Input   |

**TimeToEvent**

|                                 |                    | Value    |
|---------------------------------|--------------------|----------|
| Standard Attributes             | Position           | 25       |
|                                 | Label              | <none>   |
|                                 | Type               | Numeric  |
|                                 | Format             | F9.2     |
|                                 | Measurement        | Scale    |
|                                 | Role               | Input    |
| N                               | Valid              | 574      |
|                                 | Missing            | 0        |
| Central Tendency and Dispersion | Mean               | 73,0523  |
|                                 | Standard Deviation | 27,75555 |
|                                 | Percentile 25      | 47,0000  |
|                                 | Percentile 50      | 74,0000  |
|                                 | Percentile 75      | 100,0000 |

**PublishedasArticle**

|                     |             | Value                | Count | Percent |
|---------------------|-------------|----------------------|-------|---------|
| Standard Attributes | Position    | 26                   |       |         |
|                     | Label       | Published as article |       |         |
|                     | Type        | Numeric              |       |         |
|                     | Format      | F8                   |       |         |
|                     | Measurement | Nominal              |       |         |
|                     | Role        | Input                |       |         |
| Valid Values        | 0           | No                   | 240   | 41,8%   |
|                     | 1           | Yes                  | 334   | 58,2%   |
