# Supplementary material for: Non-Publication Is Common among Phase 1, Single-Center, Not Prospectively Registered, or Early Terminated Clinical Drug Trials
Source: PLoS One. 2016 Dec 14;11(12):e0167709. doi: 10.1371/journal.pone.0167709 (PMC5156378; doi:10.1371/journal.pone.0167709)
Supplement: S1 File — (XLSX) [file pone.0167709.s005.xlsx]

## Sheet: SPSS Toetsing online export coh
Dossier_ID_anonymized	Survey_response	Prospective_registration	Prospective_registration_1year	Prospective_registration_0days	Registration_atall	PhaseofStudyPhase1_dich	PhaseofStudy	SponsorType	CROinvolved	DrugCategory_RegularvsOther_dich	CentersInvolved	TherapeuticEffectExpected_dich	TypeofStudy	ParticipantCategory_dich	ProductRegisteredinNL	TherapeuticArea_ICD10	TherapeuticArea_Oncology	Prematureending_short	Prospective_registration_dich	ResultsRegistry	Outcome_positive_negative	EventDate	TimeToEvent	PublishedasArticle
1	1	2	2	2	1	2	5	2	2	1	1	1	1	1	3	2	2	2	2	2	2	2015-09-01	100	1
2	1	3	2	2	2	2	2	3	2	1	1	1	1	1	2	11	2	1	2	2	3	2012-07-31	62	1
3	4	1	1	1	1	2	4	3	2	1	2	1	1	1	3	4	2	1	1	2	4	2016-02-08	107	0
4	1	3	2	2	2	2	3	1	1	2	3	2	1	1	1	12	2	2	2	2	1	2011-02-15	49	1
5	4	3	2	2	2	2	4	3	2	1	1	1	3	2	2	11	2	2	2	2	4	2016-01-20	104	0
6	1	3	2	2	2	2	5	3	2	1	1	1	2	2	3	5	2	2	2	2	4	2015-09-01	103	0
7	4	1	1	1	1	2	3	1	2	2	4	1	1	1	1	1	1	1	1	2	4	2016-01-20	107	0
8	4	1	1	1	1	2	3	3	2	1	2	1	1	1	1	2	2	2	1	2	2	2013-02-21	73	1
9	4	1	1	1	1	2	3	1	1	2	4	1	1	1	1	1	1	1	1	2	4	2016-01-20	107	0
10	4	1	1	1	1	2	3	1	1	1	4	1	1	1	1	2	2	2	1	2	4	2016-01-21	105	0
11	4	2	1	2	1	2	4	2	2	1	1	2	1	1	3	6	2	1	2	2	1	2015-08-12	99	1
12	5	3	2	2	2	2	2	3	2	1	3	1	1	1	2	1	1	2	2	2	3	2014-08-07	89	1
13	4	3	2	2	2	2	5	3	2	1	1	1	1	2	3	2	2	2	2	2	4	2016-01-21	104	0
14	4	3	2	2	2	2	2	3	2	1	4	1	1	1	2	7	2	2	2	2	4	2016-01-21	99	0
15	4	1	1	1	1	2	4	1	1	1	3	1	1	1	2	4	2	2	1	2	3	2011-06-25	53	1
16	4	3	2	2	2	2	2	3	2	1	1	2	1	1	2	10	2	2	2	2	1	2009-06-02	27	1
17	4	3	2	2	2	2	4	3	2	1	1	1	1	1	2	4	2	1	2	2	4	2016-01-21	107	0
18	5	1	1	1	1	2	3	1	1	1	4	1	1	1	1	12	2	2	1	1	1	2011-06-05	50	1
19	1	1	1	1	1	2	2	1	2	1	4	1	1	1	1	1	1	2	1	1	3	2013-03-06	65	1
20	4	1	1	1	1	2	3	1	1	1	4	1	1	1	2	8	2	2	1	1	1	2012-02-02	56	1
21	4	1	1	1	1	2	3	1	1	1	4	1	1	1	2	4	2	2	1	1	2	2010-09-02	41	1
22	1	1	1	1	1	2	4	1	2	1	4	1	1	1	3	3	2	1	1	1	3	2015-09-01	101	0
23	1	3	2	2	2	1	1	3	2	2	1	2	1	1	1	1	1	2	2	2	3	2013-06-02	70	1
24	4	1	1	1	1	2	3	1	1	1	3	1	1	1	1	4	2	2	1	2	1	2011-05-01	47	1
25	4	1	1	2	1	2	3	1	1	1	3	1	1	1	1	4	2	2	1	2	1	2011-02-11	49	1
26	4	1	1	1	1	2	2	2	2	1	3	1	1	2	2	1	1	2	1	2	3	2010-10-11	44	1
27	4	3	2	2	2	2	2	2	2	1	2	1	1	1	1	3	2	2	2	2	3	2010-05-13	36	1
28	4	1	1	1	1	2	3	1	2	1	3	1	1	2	2	12	2	2	1	2	4	2016-01-21	105	0
29	1	3	2	2	2	1	1	2	2	1	1	2	1	1	1	1	1	1	2	2	4	2015-09-01	102	0
30	1	1	1	1	1	2	3	1	1	1	4	1	2	1	2	12	2	2	1	1	1	2011-09-06	51	1
31	1	3	2	2	2	2	5	3	2	1	1	2	1	1	1	3	2	2	2	2	3	2011-05-13	47	1
32	4	3	2	2	2	2	5	3	2	1	1	2	2	1	1	12	2	2	2	2	4	2016-01-21	100	0
33	4	3	2	2	2	2	5	3	2	2	1	1	1	1	1	1	1	2	2	2	4	2016-01-21	103	0
34	1	1	1	1	1	2	3	1	1	1	4	1	1	1	1	11	2	2	1	2	1	2012-11-03	64	1
35	4	1	1	1	1	2	3	1	1	1	4	1	1	1	1	2	2	2	1	1	1	2011-12-04	58	1
36	1	1	1	1	1	2	2	1	2	1	4	1	1	1	1	9	2	1	1	2	4	2015-09-01	103	0
37	5	1	1	1	1	2	2	1	2	1	4	1	1	1	1	1	1	2	1	1	1	2011-10-24	55	1
38	4	1	1	1	1	2	5	3	2	1	1	1	1	1	3	2	2	2	1	2	3	2011-11-01	54	1
39	4	1	1	1	1	2	2	1	1	1	4	1	1	1	1	1	1	2	1	1	3	2016-01-25	108	0
40	4	3	2	2	2	1	1	2	2	1	1	2	1	1	1	1	1	2	2	2	3	2015-09-11	99	1
41	4	3	2	2	2	2	5	3	2	2	1	2	2	1	3	12	2	2	2	2	3	2009-07-14	30	1
42	4	3	2	2	2	2	3	3	2	1	1	1	1	1	2	6	2	2	2	2	4	2016-01-25	107	0
43	1	1	1	1	1	2	3	1	2	1	4	1	1	1	1	1	1	2	1	1	1	2010-10-02	42	1
44	4	1	1	1	1	2	2	1	2	1	4	1	1	1	1	1	1	2	1	2	2	2011-02-07	47	1
45	1	2	1	2	1	2	2	3	2	1	2	2	2	1	1	5	2	2	2	2	1	2011-04-14	43	1
46	4	1	1	1	1	2	3	1	1	1	4	1	1	1	1	10	2	2	1	2	2	2014-05-01	83	1
47	4	1	1	1	1	2	3	1	2	1	4	1	1	1	2	1	1	2	1	1	2	2012-03-20	62	1
48	1	1	1	1	1	2	2	2	2	1	4	1	1	1	1	1	1	2	1	2	3	2011-02-14	48	1
49	1	3	2	2	2	2	5	3	2	1	1	1	1	1	3	2	2	1	2	2	4	2015-09-01	98	0
50	4	2	1	2	1	1	1	1	2	1	3	2	1	1	2	1	1	1	2	1	3	2010-01-22	36	1
51	1	3	2	2	2	1	1	1	2	1	3	2	1	1	1	2	2	2	2	2	4	2015-09-01	100	0
52	4	1	1	1	1	2	3	1	2	1	4	1	1	1	3	1	1	2	1	1	2	2012-12-17	67	1
53	4	3	2	2	2	2	3	2	2	1	1	1	1	1	2	12	2	2	2	2	4	2016-01-25	106	0
54	5	2	1	2	1	1	1	1	2	1	3	2	1	1	1	2	2	1	2	2	3	2011-10-10	54	1
55	4	3	2	2	2	2	2	2	2	1	2	1	1	1	3	7	2	1	2	2	4	2016-01-25	105	0
56	2	3	2	2	2	2	3	1	2	1	4	1	1	2	1	11	2	2	2	2	1	2010-06-03	38	1
57	4	1	1	1	1	2	4	1	2	1	4	1	1	1	3	3	2	1	1	2	4	2016-01-25	107	0
58	4	1	1	1	1	2	2	1	1	1	3	1	1	1	1	12	2	2	1	1	1	2010-07-01	38	1
59	4	1	1	1	1	2	3	1	2	1	4	1	1	1	3	2	2	2	1	1	1	2010-06-11	40	1
60	4	1	1	1	1	2	3	1	1	1	4	1	1	1	1	1	1	2	1	1	2	2012-02-27	54	1
61	4	3	2	2	2	1	1	2	2	1	2	2	1	1	2	1	1	2	2	2	3	2010-05-18	39	1
62	3	1	1	1	1	2	2	3	2	1	4	1	1	2	2	1	1	2	1	2	3	2010-07-04	40	1
63	4	3	2	2	2	2	3	3	1	1	1	1	1	1	1	2	2	1	2	2	4	2016-01-25	107	0
64	4	2	1	2	1	2	4	3	2	1	1	2	3	1	3	2	2	2	2	2	2	2010-08-12	40	1
65	4	2	2	2	1	2	5	3	2	1	1	2	1	1	1	10	2	2	2	2	4	2016-01-25	108	0
66	4	1	1	1	1	2	3	1	2	1	4	1	1	1	2	1	1	2	1	1	1	2008-07-23	18	1
67	4	1	1	1	1	2	3	1	1	1	4	1	1	1	2	8	2	2	1	1	1	2012-02-02	60	1
68	4	1	1	1	1	2	3	1	2	1	4	1	1	1	1	6	2	1	1	1	2	2014-08-23	89	1
69	1	1	1	1	1	2	2	1	2	1	3	1	1	1	1	8	2	2	1	2	1	2011-06-16	52	1
70	1	3	2	2	2	1	1	1	2	1	2	2	1	1	2	5	2	2	2	2	4	2015-09-01	100	0
71	4	1	1	1	1	2	3	1	1	1	4	1	1	1	2	8	2	2	1	1	2	2011-04-07	49	1
72	4	2	1	2	1	2	5	3	2	2	1	2	2	1	1	1	1	2	2	2	3	2010-10-18	40	1
73	4	1	1	1	1	2	2	1	1	1	4	1	1	1	1	1	1	2	1	2	3	2010-04-12	38	1
74	4	3	2	2	2	2	5	3	2	1	2	1	1	1	3	9	2	2	2	2	1	2012-10-31	65	1
75	4	3	2	2	2	2	5	3	2	1	1	2	1	1	1	10	2	2	2	2	3	2010-09-01	43	1
76	1	1	1	1	1	2	3	1	2	1	3	1	1	1	3	9	2	2	1	1	1	2011-02-13	46	1
77	1	1	1	1	1	2	3	1	2	1	3	1	1	1	2	9	2	2	1	1	2	2010-05-28	37	1
78	4	3	2	2	2	2	5	2	2	1	1	2	1	1	1	3	2	2	2	2	1	2011-03-22	48	1
79	1	2	1	2	1	1	1	3	2	2	1	2	1	1	1	6	2	1	2	2	4	2015-09-01	101	0
80	4	3	2	2	2	2	2	3	2	1	1	2	2	1	1	9	2	2	2	2	4	2016-01-27	105	0
81	4	1	1	1	1	2	3	1	2	1	4	1	1	2	2	4	2	2	1	1	2	2013-06-20	74	1
82	4	1	1	1	1	2	2	1	2	2	3	1	1	1	1	6	2	2	1	2	1	2014-02-06	82	1
83	4	1	1	1	1	2	4	1	1	1	4	1	1	1	3	7	2	2	1	2	4	2016-01-27	106	0
84	4	1	1	1	1	2	2	1	2	1	4	1	1	1	1	1	1	1	1	2	4	2016-01-27	108	0
85	4	1	1	1	1	2	5	1	2	1	4	1	1	1	1	6	2	2	1	2	3	2010-01-13	35	1
86	4	3	2	2	2	2	5	2	2	2	1	1	1	1	3	9	2	2	2	2	4	2016-01-27	106	0
87	4	3	2	2	2	2	5	2	2	1	1	2	2	1	3	12	2	2	2	2	4	2016-01-27	104	0
88	1	2	2	2	1	2	2	3	2	1	3	1	1	1	2	1	1	2	2	2	3	2013-09-04	78	1
89	1	3	2	2	2	2	2	3	2	1	1	1	1	1	1	2	2	2	2	2	1	2010-04-13	37	1
90	4	2	1	2	1	1	1	2	2	1	2	2	1	1	3	1	1	2	2	2	3	2014-05-01	83	1
91	4	3	2	2	2	2	3	3	2	1	2	1	1	1	3	6	2	2	2	2	1	2013-01-16	72	1
92	1	1	1	1	1	2	2	1	2	1	4	1	1	1	1	8	2	2	1	1	1	2015-09-01	102	0
93	4	1	1	1	1	2	3	1	1	1	4	1	1	1	1	7	2	2	1	1	1	2012-05-10	61	1
94	4	1	1	2	1	2	3	1	1	1	4	1	1	1	1	2	2	2	1	1	1	2008-11-25	21	1
95	1	1	1	1	1	2	2	1	2	1	4	1	1	1	1	6	2	2	1	1	1	2010-08-06	41	1
96	4	1	1	1	1	2	4	1	2	1	4	1	1	1	3	9	2	2	1	1	1	2012-05-05	59	1
97	4	1	1	2	1	2	5	3	2	1	1	2	1	1	3	6	2	2	1	2	1	2009-07-30	29	1
98	1	1	1	1	1	2	2	1	2	1	3	1	1	2	1	9	2	2	1	2	3	2012-01-27	55	1
99	4	1	1	1	1	2	3	1	2	1	4	1	1	2	3	7	2	2	1	1	1	2009-07-14	28	1
100	2	1	1	1	1	2	3	1	2	1	4	1	1	1	2	1	1	1	1	1	2	2012-02-13	56	1
101	4	1	1	1	1	2	2	1	2	2	1	1	1	1	1	4	2	1	1	2	1	2012-01-31	52	1
102	3	1	1	1	1	2	2	2	2	1	1	2	1	1	2	3	2	2	1	2	3	2009-12-17	34	1
103	4	1	1	1	1	2	3	1	1	1	4	1	1	1	1	3	2	1	1	1	3	2016-01-27	108	0
104	1	1	1	2	1	2	3	1	1	1	3	1	1	1	1	8	2	2	1	2	1	2010-10-01	43	1
105	4	3	2	2	2	2	5	3	2	1	1	2	1	1	3	3	2	2	2	2	3	2011-01-26	48	1
106	4	3	2	2	2	2	5	3	2	1	1	1	1	1	2	7	2	2	2	2	3	2012-02-10	53	1
107	1	2	2	2	1	2	3	3	2	1	1	1	2	1	2	4	2	2	2	2	4	2015-09-01	102	0
108	4	1	1	2	1	2	2	1	2	1	4	1	1	1	1	1	1	1	1	2	4	2016-01-27	106	0
109	1	3	2	2	2	2	2	2	2	1	1	1	1	2	2	2	2	1	2	2	4	2015-12-01	104	0
110	4	2	1	2	1	2	5	3	2	1	2	1	1	1	3	1	1	2	2	2	4	2016-01-28	106	0
111	4	3	2	2	2	2	3	3	2	1	2	1	1	1	2	3	2	2	2	2	2	2013-01-21	65	1
112	1	1	1	1	1	2	2	1	1	1	4	1	1	1	2	3	2	1	1	1	3	2015-09-01	102	0
113	4	1	1	1	1	2	3	1	2	1	4	1	1	2	2	10	2	2	1	1	1	2011-12-08	48	1
114	4	3	2	2	2	2	4	2	2	1	2	1	1	1	3	9	2	2	2	2	1	2013-05-28	75	1
115	1	3	2	2	2	2	2	3	2	1	2	2	1	1	2	4	2	2	2	2	3	2014-12-04	90	1
116	2	1	1	1	1	2	2	1	2	1	3	1	1	1	1	11	2	2	1	2	4	2016-02-08	106	0
117	4	3	2	2	2	2	3	3	2	1	1	1	1	2	2	12	2	1	2	2	4	2016-01-28	106	0
118	4	2	1	2	1	2	4	2	2	1	2	1	1	2	3	7	2	2	2	2	4	2016-01-28	106	0
119	4	3	2	2	2	2	3	2	2	1	2	1	1	1	2	11	2	2	2	2	4	2016-01-28	107	0
120	4	1	1	1	1	2	5	3	2	1	2	1	1	2	3	11	2	2	1	2	4	2016-01-28	103	0
121	4	2	1	2	1	2	3	3	2	1	2	1	1	1	2	7	2	2	2	2	4	2016-01-28	105	0
122	4	1	1	1	1	2	3	1	2	1	4	1	1	1	1	12	2	2	1	1	1	2010-01-14	31	1
123	1	1	1	1	1	2	4	2	2	1	1	1	1	1	3	4	2	2	1	2	2	2013-09-01	76	1
124	1	1	1	1	1	2	2	1	2	1	4	1	1	1	1	4	2	2	1	1	1	2009-06-17	29	1
125	1	1	1	1	1	2	4	1	2	1	4	1	1	2	3	3	2	2	1	1	3	2012-09-17	61	1
126	1	1	1	1	1	2	3	1	1	1	4	1	1	1	2	10	2	2	1	2	1	2013-04-01	70	1
127	4	2	1	2	1	2	3	1	1	1	4	1	1	1	1	1	1	2	2	2	3	2011-05-22	50	1
128	4	1	1	1	1	2	3	1	2	1	4	1	1	1	1	10	2	1	1	1	2	2012-07-01	61	1
129	4	3	2	2	2	2	2	3	2	2	1	1	1	1	3	1	1	2	2	2	4	2016-01-28	106	0
130	4	1	1	2	1	2	2	1	2	1	4	1	1	1	1	9	2	2	1	1	3	2016-01-28	104	0
131	4	1	1	1	1	2	3	1	1	1	4	1	1	1	1	8	2	2	1	1	2	2012-12-01	65	1
132	1	2	1	2	1	2	3	2	2	1	3	1	1	1	2	1	1	2	2	2	4	2015-09-01	99	0
133	4	3	2	2	2	2	5	3	2	1	1	1	1	1	3	12	2	2	2	2	3	2008-11-01	21	1
134	4	1	1	2	1	2	2	1	2	1	4	1	1	1	1	1	1	1	1	2	4	2016-01-28	106	0
135	4	1	1	1	1	2	3	1	1	1	4	1	1	1	1	8	2	2	1	1	1	2013-01-10	66	1
136	4	3	2	2	2	2	3	2	2	1	1	1	1	1	2	4	2	2	2	2	4	2016-01-28	104	0
137	1	1	1	1	1	2	3	1	2	1	4	1	1	2	2	10	2	2	1	1	3	2010-03-20	29	1
138	1	3	2	2	2	1	1	1	1	1	1	2	1	1	1	2	2	2	2	2	4	2015-09-01	103	0
139	4	1	1	2	1	2	3	1	1	1	4	1	1	1	2	4	2	2	1	1	1	2010-09-23	43	1
140	1	1	1	1	1	2	3	1	1	2	4	1	1	1	1	1	1	2	1	1	1	2013-12-09	77	1
141	1	1	1	1	1	2	3	1	2	1	4	1	1	2	3	7	2	2	1	1	1	2010-06-18	39	1
142	1	2	1	2	1	1	1	1	2	1	4	2	1	1	1	1	1	2	2	2	1	2010-02-23	36	1
143	5	3	2	2	2	2	2	3	2	1	1	1	1	1	2	1	1	2	2	2	3	2011-07-29	51	1
144	1	3	2	2	2	1	1	1	1	1	1	2	1	1	1	12	2	2	2	2	4	2015-09-01	103	0
145	4	3	2	2	2	2	5	3	2	1	1	2	1	1	2	5	2	2	2	2	3	2008-07-17	13	1
146	4	1	1	1	1	2	3	1	1	1	4	1	1	1	1	7	2	2	1	1	1	2010-11-11	45	1
147	4	3	2	2	2	2	2	3	2	1	3	1	1	1	1	1	1	1	2	2	3	2011-06-20	48	1
148	1	1	1	1	1	2	3	3	2	1	4	1	1	1	2	12	2	1	1	2	4	2015-09-01	97	0
149	4	3	2	2	2	2	2	3	2	1	1	1	1	1	2	1	1	2	2	2	3	2010-01-11	33	1
150	4	2	1	2	1	2	3	3	1	1	2	1	1	1	3	1	1	2	2	2	4	2016-01-28	108	0
151	4	1	1	1	1	2	3	1	2	1	4	1	1	1	2	10	2	2	1	1	1	2011-01-05	42	1
152	1	1	1	1	1	2	3	1	2	1	3	1	1	1	2	1	1	2	1	2	1	2012-10-29	68	1
153	1	1	1	2	1	2	5	2	2	1	1	2	1	1	2	4	2	2	1	2	2	2011-12-07	57	1
154	1	3	2	2	2	2	2	1	1	1	1	1	1	1	1	8	2	1	2	2	1	2010-09-01	40	1
155	1	1	1	1	1	2	5	2	2	1	3	1	1	2	3	8	2	2	1	2	1	2011-07-07	50	1
156	4	1	1	2	1	2	3	1	2	1	4	1	1	1	1	4	2	2	1	1	1	2010-12-23	46	1
157	4	1	1	1	1	2	2	1	1	1	4	1	1	1	1	12	2	2	1	2	1	2012-09-27	63	1
158	4	1	1	1	1	2	2	1	1	1	3	1	2	1	1	2	2	1	1	2	4	2016-01-28	105	0
159	1	3	2	2	2	2	5	3	2	1	1	2	2	1	3	1	1	2	2	2	4	2015-09-01	100	0
160	1	3	2	2	2	1	1	1	1	1	1	2	1	1	1	6	2	2	2	2	4	2015-09-01	103	0
161	4	3	2	2	2	2	5	3	2	1	1	1	1	1	3	4	2	2	2	2	1	2009-11-26	32	1
162	4	1	1	2	1	2	3	1	2	1	4	1	1	1	1	4	2	2	1	1	1	2010-02-01	35	1
163	4	2	1	2	1	2	3	1	2	1	4	1	1	1	2	2	2	2	2	2	1	2015-12-29	98	1
164	4	3	2	2	2	2	5	3	2	2	1	2	1	1	1	5	2	2	2	2	3	2012-05-14	60	1
165	1	3	2	2	2	2	4	2	2	1	2	2	3	1	3	9	2	2	2	2	3	2014-08-01	90	1
166	1	3	2	2	2	2	5	2	2	1	3	1	1	2	3	9	2	2	2	2	4	2015-09-01	98	0
167	4	3	2	2	2	1	1	1	1	1	1	2	3	1	1	2	2	2	2	2	4	2016-01-28	108	0
168	4	2	1	2	1	2	5	3	2	1	3	1	1	1	3	3	2	2	2	2	2	2010-05-26	37	1
169	1	2	1	2	1	1	1	1	1	1	3	2	1	1	1	3	2	2	2	2	4	2015-09-01	103	0
170	1	1	1	1	1	2	3	1	1	1	4	1	1	1	1	4	2	2	1	1	1	2011-08-10	53	1
171	4	2	1	2	1	1	1	2	2	1	1	2	1	1	2	1	1	2	2	2	3	2010-11-02	41	1
172	4	2	2	2	1	1	1	1	1	1	1	2	1	1	1	7	2	2	2	2	3	2013-06-01	76	1
173	1	3	2	2	2	1	1	1	1	1	1	2	1	1	1	8	2	2	2	2	3	2014-05-11	85	1
174	4	2	1	2	1	2	3	1	2	1	4	1	1	1	1	10	2	2	2	1	3	2016-01-28	104	0
175	1	1	1	1	1	2	3	1	2	1	4	1	1	1	1	5	2	2	1	2	3	2014-02-03	80	1
176	4	3	2	2	2	1	1	1	1	1	1	2	1	1	1	6	2	2	2	2	4	2016-01-28	108	0
177	4	3	2	2	2	2	3	3	2	1	2	1	1	1	2	3	2	2	2	2	2	2010-12-15	44	1
178	4	3	2	2	2	2	4	3	2	1	1	1	1	1	3	9	2	1	2	2	4	2016-01-28	103	0
179	1	1	1	1	1	2	3	1	1	1	4	1	1	1	2	1	1	2	1	1	1	2013-09-10	72	1
180	1	2	1	2	1	2	2	1	2	1	4	1	1	1	1	8	2	2	2	1	1	2015-03-03	96	1
181	4	2	2	2	1	1	1	1	2	1	1	2	1	1	1	6	2	2	2	2	3	2009-10-21	32	1
182	4	3	2	2	2	2	2	1	1	1	4	1	1	1	1	3	2	1	2	2	4	2016-01-28	107	0
183	1	3	2	2	2	2	3	1	2	1	1	2	1	1	3	3	2	2	2	2	4	2015-09-01	101	0
184	4	2	1	2	1	2	2	1	1	1	4	2	1	1	1	2	2	1	2	2	4	2016-01-28	105	0
185	4	3	2	2	2	2	2	2	2	1	2	1	1	2	2	11	2	2	2	2	4	2016-01-28	99	0
186	4	1	1	1	1	2	3	1	2	1	4	1	1	1	1	10	2	1	1	1	2	2012-07-01	61	1
187	4	2	2	2	1	2	2	2	2	1	1	1	1	1	2	4	2	2	2	2	2	2012-11-08	64	1
188	4	3	2	2	2	1	1	1	1	1	1	2	1	1	1	4	2	2	2	2	4	2016-01-28	108	0
189	1	3	2	2	2	2	5	3	2	1	1	2	3	1	2	5	2	2	2	2	3	2009-10-01	29	1
190	4	2	2	2	1	2	4	3	2	1	2	1	1	1	2	3	2	2	2	2	1	2015-11-16	102	1
191	1	2	2	2	1	2	5	2	2	2	2	2	2	1	1	4	2	1	2	2	4	2015-09-01	96	0
192	4	1	1	1	1	2	3	1	1	1	4	1	1	1	1	6	2	2	1	1	1	2015-12-09	101	1
193	4	1	1	2	1	2	2	1	2	1	4	1	1	1	1	3	2	2	1	2	1	2011-02-23	47	1
194	1	3	2	2	2	2	2	3	2	1	1	1	1	1	1	5	2	1	2	2	4	2015-09-01	97	0
195	4	2	1	2	1	2	2	3	2	1	1	1	1	1	2	4	2	2	2	2	4	2016-01-29	106	0
196	4	2	1	2	1	1	1	1	2	1	3	2	1	1	1	1	1	1	2	2	3	2011-01-01	46	1
197	4	3	2	2	2	2	2	3	2	1	1	1	1	1	2	7	2	2	2	2	4	2016-01-29	100	0
198	3	1	1	1	1	2	3	3	2	1	2	1	1	1	3	8	2	2	1	2	1	2013-03-27	72	1
199	1	1	1	1	1	2	3	1	2	1	4	1	1	1	2	1	1	2	1	1	1	2011-11-25	56	1
200	1	3	2	2	2	2	5	3	1	1	1	2	2	2	2	3	2	2	2	2	3	2013-06-01	70	1
201	4	1	1	1	1	1	1	1	2	1	3	2	1	1	1	1	1	1	1	2	3	2013-08-27	75	1
202	4	3	2	2	2	2	5	3	2	1	1	2	1	1	2	5	2	2	2	2	4	2016-01-29	102	0
203	4	3	2	2	2	1	1	1	1	1	1	2	1	1	1	4	2	2	2	2	4	2016-01-29	108	0
204	4	3	2	2	2	2	5	3	2	1	1	2	1	1	2	4	2	2	2	2	3	2010-07-01	36	1
205	4	3	2	2	2	2	3	3	2	1	1	1	1	1	2	2	2	1	2	2	4	2016-01-29	99	0
206	4	1	1	2	1	2	4	3	2	1	1	2	1	1	2	4	2	2	1	2	1	2009-04-09	24	1
207	4	3	2	2	2	2	3	3	2	1	1	1	1	1	2	5	2	1	2	2	4	2016-01-29	101	0
208	4	3	2	2	2	2	5	2	2	1	1	2	3	2	2	7	2	2	2	2	4	2015-12-09	100	0
209	4	1	1	1	1	2	2	1	1	1	4	1	1	1	1	6	2	2	1	1	1	2010-04-08	36	1
210	4	2	1	2	1	2	2	1	1	1	4	1	1	1	1	6	2	2	2	1	3	2015-12-09	104	0
211	1	2	1	2	1	2	4	3	2	1	3	1	2	1	2	10	2	2	2	2	1	2009-07-29	27	1
212	4	1	1	1	1	2	2	1	2	1	4	1	1	1	1	7	2	2	1	1	3	2012-12-24	69	1
213	1	2	1	2	1	2	4	1	2	1	3	1	1	1	3	8	2	2	2	1	1	2010-07-01	40	1
214	4	2	1	2	1	2	3	2	2	1	2	1	1	1	3	11	2	1	2	2	2	2013-02-22	64	1
215	1	3	2	2	2	2	4	3	2	1	2	1	1	1	3	2	2	2	2	2	2	2012-04-24	58	1
216	4	1	1	2	1	2	3	1	2	1	4	1	1	1	2	2	2	2	1	1	3	2016-01-29	106	0
217	4	3	2	2	2	1	1	2	1	1	2	2	1	1	2	5	2	2	2	2	4	2016-01-29	107	0
218	1	2	1	2	1	1	1	1	2	1	3	2	1	1	1	1	1	2	2	2	3	2012-04-24	60	1
219	1	2	2	2	1	1	1	3	2	2	1	2	1	1	1	6	2	2	2	2	3	2011-01-10	42	1
220	2	1	1	1	1	2	3	1	2	1	4	2	1	1	2	1	1	1	1	1	1	2011-02-10	46	1
221	1	2	1	2	1	2	5	3	2	1	1	2	1	1	2	12	2	2	2	2	3	2010-10-09	42	1
222	1	3	2	2	2	2	5	3	2	1	1	2	3	1	3	4	2	2	2	2	3	2015-02-26	90	1
223	5	2	1	2	1	2	2	1	1	1	1	1	1	1	1	4	2	2	2	2	2	2011-06-13	47	1
224	1	3	2	2	2	2	5	3	2	1	1	2	3	1	2	4	2	2	2	2	3	2010-12-24	40	1
225	4	3	2	2	2	1	1	1	1	1	1	2	1	1	1	2	2	2	2	2	4	2016-02-01	107	0
226	4	1	1	1	1	2	4	1	2	1	2	1	1	1	3	8	2	1	1	2	4	2016-02-01	100	0
227	4	2	1	2	1	2	2	1	1	1	4	1	1	1	1	4	2	2	2	2	1	2011-08-14	53	1
228	1	3	2	2	2	2	3	1	2	1	4	1	1	1	1	9	2	2	2	2	2	2014-02-19	77	1
229	1	3	2	2	2	2	2	1	1	1	3	1	1	1	1	3	2	2	2	2	4	2015-09-01	100	0
230	4	1	1	1	1	2	3	1	1	1	4	1	1	1	1	7	2	2	1	1	1	2011-11-29	51	1
231	1	3	2	2	2	1	1	1	1	1	1	2	1	1	1	8	2	1	2	2	4	2015-09-01	102	0
232	4	1	1	1	1	2	2	1	1	1	4	1	1	1	1	1	1	1	1	2	3	2014-08-15	87	1
233	4	1	1	2	1	2	5	1	1	1	3	2	1	1	1	10	2	2	1	2	3	2012-03-10	54	1
234	4	1	1	1	1	2	2	1	1	1	4	1	1	1	1	1	1	1	1	1	3	2016-02-01	103	0
235	4	2	1	2	1	2	3	1	2	1	4	1	1	1	3	9	2	2	2	1	1	2014-07-02	86	1
236	1	3	2	2	2	1	1	1	1	1	1	2	1	1	1	2	2	2	2	2	3	2013-06-01	74	1
237	5	3	2	2	2	2	2	1	2	1	2	1	1	1	1	4	2	2	2	2	3	2009-04-30	23	1
238	4	2	1	2	1	2	2	2	2	1	2	1	1	1	2	1	1	2	2	2	4	2016-02-01	103	0
239	1	1	1	1	1	2	2	1	1	1	4	1	1	1	2	11	2	2	1	1	1	2010-11-06	36	1
240	4	3	2	2	2	1	1	2	2	1	1	2	1	1	2	1	1	2	2	2	4	2016-02-01	103	0
241	4	3	2	2	2	2	5	3	2	1	1	1	1	1	2	12	2	2	2	2	1	2012-05-21	57	1
242	4	1	1	2	1	2	2	1	1	1	2	2	1	1	1	8	2	2	1	2	4	2016-02-01	107	0
243	4	3	2	2	2	2	5	3	2	1	1	1	1	1	2	2	2	2	2	2	2	2011-02-01	41	1
244	4	3	2	2	2	2	3	2	2	1	2	1	1	1	1	1	1	2	2	2	4	2016-02-01	100	0
245	4	3	2	2	2	2	4	3	2	1	1	2	1	1	3	2	2	2	2	2	4	2016-02-01	103	0
246	1	3	2	2	2	2	5	2	1	1	1	2	2	1	1	5	2	2	2	2	3	2010-07-23	38	1
247	4	3	2	2	2	2	5	3	2	1	2	1	1	1	3	10	2	2	2	2	4	2016-02-01	99	0
248	1	1	1	1	1	2	2	1	2	1	4	1	1	1	1	3	2	2	1	2	4	2015-09-01	102	0
249	4	3	2	2	2	1	1	1	1	1	1	2	1	1	1	4	2	2	2	2	4	2016-02-01	107	0
250	1	1	1	1	1	2	3	1	2	1	4	1	1	1	1	2	2	2	1	2	4	2015-09-01	97	0
251	1	3	2	2	2	1	1	1	1	1	1	2	1	1	1	10	2	2	2	2	4	2015-09-01	101	0
252	4	3	2	2	2	2	3	3	2	1	1	1	1	1	2	2	2	2	2	2	1	2011-03-03	41	1
253	4	1	1	1	1	2	3	1	1	1	4	1	1	1	1	3	2	1	1	1	1	2011-10-27	49	1
254	4	1	1	1	1	2	3	1	1	1	4	1	1	1	1	4	2	2	1	2	2	2010-06-08	35	1
255	4	2	2	2	1	2	2	3	2	1	1	1	1	1	2	1	1	2	2	2	3	2015-03-31	96	1
256	1	1	1	1	1	2	2	1	2	1	3	1	1	1	3	12	2	1	1	1	1	2012-03-17	57	1
257	4	1	1	1	1	2	3	1	1	1	4	1	1	2	1	6	2	2	1	2	4	2016-02-01	103	0
258	4	1	1	1	1	2	2	1	2	1	4	1	1	1	1	1	1	1	1	2	3	2012-05-01	59	1
259	4	2	1	2	1	2	4	1	2	1	3	1	1	1	3	3	2	2	2	2	1	2010-04-01	33	1
260	4	3	2	2	2	2	2	1	2	1	1	1	1	2	3	12	2	1	2	2	4	2016-02-01	105	0
261	1	3	2	2	2	2	2	1	1	1	4	1	1	1	1	1	1	2	2	2	4	2015-09-01	97	0
262	4	3	2	2	2	2	5	3	2	1	1	2	3	1	2	11	2	1	2	2	4	2016-02-01	99	0
263	4	3	2	2	2	1	1	1	1	1	1	2	1	1	1	3	2	2	2	2	4	2016-02-01	105	0
264	4	2	1	2	1	2	3	1	1	1	3	1	1	1	1	1	1	2	2	2	1	2011-11-01	54	1
265	4	1	1	1	1	2	3	2	2	1	2	1	1	1	2	2	2	2	1	2	1	2010-06-28	32	1
266	4	1	1	1	1	2	4	1	1	1	4	1	1	1	3	3	2	2	1	1	1	2009-02-16	20	1
267	1	1	1	1	1	1	1	1	2	1	3	2	1	1	1	1	1	2	1	2	3	2012-01-29	52	1
268	1	2	1	2	1	2	2	3	2	1	1	1	1	1	2	1	1	2	2	2	3	2013-05-03	69	1
269	1	2	1	2	1	2	4	1	2	1	3	1	1	1	3	2	2	2	2	1	1	2011-02-26	46	1
270	4	2	2	2	1	2	3	2	2	1	4	1	1	1	1	12	2	1	2	2	4	2016-02-02	99	0
271	4	3	2	2	2	1	1	1	1	1	1	2	1	1	1	4	2	2	2	2	4	2016-02-02	105	0
272	4	3	2	2	2	2	5	3	2	1	1	2	1	1	1	5	2	2	2	2	3	2011-09-28	51	1
273	4	1	1	1	1	2	3	1	1	1	4	1	1	1	1	4	2	2	1	1	1	2011-06-14	43	1
274	1	2	2	2	1	1	1	1	1	1	1	2	1	1	1	8	2	2	2	2	4	2015-09-01	101	0
275	1	3	2	2	2	2	3	3	2	1	1	1	1	2	2	2	2	1	2	2	4	2015-09-01	95	0
276	1	1	1	2	1	2	3	1	2	1	4	1	1	1	1	4	2	2	1	1	2	2010-04-06	33	1
277	4	2	1	2	1	2	4	3	2	1	1	1	3	1	2	10	2	2	2	2	4	2016-02-02	104	0
278	2	1	1	1	1	2	3	1	2	1	4	1	1	1	1	6	2	2	1	1	3	2012-04-17	55	1
279	1	3	2	2	2	1	1	1	2	1	1	2	1	1	1	11	2	2	2	2	4	2015-09-01	101	0
280	4	1	1	1	1	2	3	1	1	1	4	1	1	1	2	3	2	2	1	1	1	2009-06-15	26	1
281	2	3	2	2	2	1	1	1	1	1	1	2	3	1	3	2	2	2	2	2	4	2016-02-08	106	0
282	4	1	1	1	1	2	3	1	1	1	4	1	1	1	1	2	2	2	1	1	2	2010-11-10	43	1
283	1	3	2	2	2	2	3	3	2	1	1	1	1	1	2	9	2	2	2	2	2	2011-05-08	46	1
284	4	1	1	1	1	2	2	1	2	1	4	1	1	1	2	1	1	1	1	1	3	2013-02-26	68	1
285	4	2	1	2	1	2	4	1	2	1	4	1	1	1	3	3	2	2	2	1	1	2009-12-01	32	1
286	4	3	2	2	2	2	2	2	2	1	2	1	1	1	2	1	1	1	2	2	4	2016-02-02	102	0
287	4	1	1	1	1	2	3	1	1	1	4	1	1	1	2	11	2	2	1	1	1	2011-07-13	46	1
288	4	3	2	2	2	2	2	3	2	1	1	1	1	1	2	2	2	2	2	2	3	2009-05-31	22	1
289	2	3	2	2	2	1	1	1	1	1	1	2	2	1	1	2	2	2	2	2	4	2016-02-08	107	0
290	1	3	2	2	2	2	4	1	2	1	4	1	1	1	1	4	2	2	2	2	4	2015-09-01	94	0
291	1	3	2	2	2	2	5	3	2	1	1	1	1	1	3	5	2	2	2	2	1	2014-01-18	80	1
292	1	3	2	2	2	2	5	3	2	1	1	1	1	2	3	10	2	1	2	2	4	2015-09-01	94	0
293	4	1	1	1	1	2	2	1	1	1	3	1	1	2	1	4	2	1	1	2	4	2016-02-02	97	0
294	4	1	1	2	1	2	3	1	2	1	4	1	1	1	3	1	1	2	1	2	1	2010-12-16	42	1
295	4	1	1	1	1	2	3	1	1	1	4	1	1	1	1	1	1	2	1	1	3	2011-07-23	49	1
296	4	1	1	1	1	2	2	1	1	1	3	2	1	1	1	2	2	2	1	1	1	2011-08-29	50	1
297	4	3	2	2	2	1	1	1	1	1	1	2	1	1	1	4	2	2	2	2	4	2016-02-02	106	0
298	4	2	1	2	1	2	5	2	2	1	1	2	1	1	3	7	2	2	2	2	3	2013-07-03	72	1
299	1	3	2	2	2	2	5	3	2	1	1	1	1	1	3	2	2	2	2	2	4	2015-12-09	100	0
300	4	2	1	2	1	2	2	1	2	1	4	1	1	1	1	1	1	2	2	1	2	2012-10-26	62	1
301	4	1	1	1	1	2	3	1	1	1	4	1	1	1	1	12	2	2	1	2	4	2015-12-09	98	0
302	4	2	1	2	1	2	2	1	1	1	3	1	1	1	2	1	1	1	2	1	1	2011-11-04	55	1
303	4	1	1	1	1	2	3	1	1	1	4	1	1	1	1	8	2	1	1	1	1	2011-12-07	52	1
304	2	3	2	2	2	1	1	1	1	1	1	2	1	1	1	3	2	2	2	2	4	2016-02-08	106	0
305	4	1	1	1	1	2	3	1	1	1	3	1	1	1	1	9	2	2	1	1	1	2012-08-21	63	1
306	4	3	2	2	2	2	5	2	2	1	1	2	2	1	3	1	1	2	2	2	4	2016-02-02	103	0
307	4	3	2	2	2	2	5	2	2	1	1	2	2	1	2	1	1	2	2	2	4	2016-02-02	103	0
308	4	1	1	1	1	2	3	1	2	1	4	1	1	2	1	7	2	2	1	2	4	2016-02-02	100	0
309	4	3	2	2	2	2	2	2	2	2	1	1	2	1	2	1	1	2	2	2	3	2011-08-23	48	1
310	1	3	2	2	2	2	5	3	2	1	1	2	1	1	3	3	2	1	2	2	4	2015-09-01	98	0
311	4	3	2	2	2	2	3	3	2	1	2	1	1	1	3	1	1	2	2	2	4	2016-02-02	100	0
312	4	3	2	2	2	1	1	1	2	1	1	2	1	1	1	5	2	2	2	2	3	2012-05-08	60	1
313	4	3	2	2	2	2	2	3	2	1	3	1	1	1	3	1	1	1	2	2	4	2016-02-02	98	0
314	1	3	2	2	2	1	1	1	1	1	1	2	1	1	1	2	2	2	2	2	4	2015-09-01	100	0
315	1	2	1	2	1	2	2	2	2	1	1	1	1	1	2	7	2	2	2	2	2	2015-01-22	88	1
316	3	3	2	2	2	2	2	1	1	1	1	2	1	1	1	6	2	2	2	2	3	2011-06-11	49	1
317	4	1	1	1	1	2	3	1	2	1	3	1	1	1	1	5	2	2	1	1	3	2016-02-02	103	0
318	4	1	1	1	1	2	3	2	1	1	4	1	1	1	1	2	2	2	1	2	2	2013-10-28	74	1
319	4	1	1	2	1	1	1	1	1	1	1	2	1	1	1	3	2	2	1	2	4	2016-02-02	105	0
320	4	3	2	2	2	1	1	1	1	1	1	2	1	1	1	3	2	2	2	2	4	2016-02-02	105	0
321	2	3	2	2	2	1	1	1	1	1	1	2	1	1	1	2	2	1	2	2	4	2016-02-08	105	0
322	4	2	1	2	1	2	4	2	2	1	1	1	1	1	2	2	2	2	2	2	3	2009-08-06	27	1
323	1	3	2	2	2	1	1	1	1	1	1	2	1	1	1	5	2	2	2	2	4	2015-09-01	100	0
324	1	3	2	2	2	2	4	2	2	1	2	1	1	1	3	9	2	2	2	2	1	2013-04-19	67	1
325	4	3	2	2	2	2	5	3	2	1	1	2	2	1	1	8	2	2	2	2	3	2015-01-27	91	1
326	4	3	2	2	2	1	1	1	2	1	1	2	1	1	1	5	2	2	2	2	3	2011-09-02	51	1
327	4	3	2	2	2	1	1	1	1	1	1	2	1	1	1	5	2	2	2	2	4	2016-02-02	105	0
328	4	3	2	2	2	2	4	2	2	1	1	1	1	1	3	12	2	1	2	2	4	2016-02-02	103	0
329	4	3	2	2	2	1	1	1	1	1	1	2	1	1	1	2	2	2	2	2	4	2016-02-02	105	0
330	1	1	1	1	1	2	3	1	2	1	4	1	1	1	1	1	1	2	1	1	1	2010-06-05	35	1
331	4	3	2	2	2	2	5	1	2	1	4	2	2	1	3	9	2	2	2	2	4	2016-02-02	103	0
332	1	1	1	2	1	1	1	1	1	2	1	2	1	1	1	3	2	2	1	2	3	2014-09-06	84	1
333	4	3	2	2	2	2	5	3	2	1	1	2	1	1	2	12	2	2	2	2	3	2011-05-11	45	1
334	4	1	1	1	1	2	3	1	1	1	3	1	1	2	1	12	2	2	1	2	1	2013-07-10	69	1
335	1	1	1	2	1	2	4	3	2	1	1	1	1	1	1	3	2	2	1	2	2	2010-04-22	29	1
336	2	2	1	2	1	2	4	1	2	1	4	1	1	1	3	8	2	2	2	1	2	2016-02-08	104	0
337	4	1	1	1	1	2	5	3	2	1	1	2	1	2	3	8	2	2	1	2	3	2012-12-05	66	1
338	1	1	1	2	1	2	2	1	2	1	4	1	2	1	1	8	2	2	1	1	1	2011-09-22	50	1
339	4	1	1	1	1	2	4	3	2	1	1	2	1	1	2	4	2	2	1	2	4	2016-02-02	104	0
340	1	3	2	2	2	1	1	1	1	1	1	2	1	1	1	7	2	2	2	2	4	2015-09-01	100	0
341	4	2	1	2	1	2	3	2	2	1	3	1	1	1	2	4	2	1	2	2	4	2016-02-02	100	0
342	2	3	2	2	2	1	1	1	1	1	1	2	1	1	1	12	2	2	2	2	4	2016-02-08	105	0
343	1	3	2	2	2	2	4	3	2	1	1	2	2	1	3	2	2	2	2	2	3	2014-07-01	84	1
344	4	2	1	2	1	1	1	1	1	1	3	2	1	1	1	3	2	2	2	2	4	2016-02-02	105	0
345	4	3	2	2	2	2	5	3	2	1	1	2	1	1	2	4	2	2	2	2	4	2016-02-02	103	0
346	1	3	2	2	2	2	5	3	2	1	1	2	2	1	2	5	2	2	2	2	4	2015-09-01	96	0
347	4	1	1	1	1	2	3	1	1	1	4	1	1	1	1	4	2	2	1	2	2	2010-10-07	39	1
348	4	2	1	2	1	2	2	3	2	1	1	2	1	1	1	6	2	2	2	2	4	2016-02-02	103	0
349	4	1	1	2	1	2	5	3	2	1	1	2	2	1	3	4	2	2	1	2	3	2010-08-23	36	1
350	4	3	2	2	2	2	2	2	1	1	1	2	1	1	2	5	2	1	2	2	4	2016-02-02	104	0
351	1	1	1	1	1	2	4	3	2	1	1	1	1	1	3	9	2	2	1	2	4	2015-09-01	97	0
352	4	1	1	1	1	2	3	1	1	1	4	1	1	1	1	4	2	1	1	1	2	2011-11-13	49	1
353	4	1	1	1	1	2	2	1	1	1	3	1	1	1	1	9	2	2	1	2	4	2016-02-02	100	0
354	1	3	2	2	2	2	5	2	1	1	1	2	1	1	3	2	2	2	2	2	3	2011-03-09	43	1
355	4	1	1	1	1	2	3	1	1	1	3	1	1	2	1	2	2	2	1	2	1	2012-03-21	57	1
356	2	1	1	1	1	2	3	1	2	1	3	1	1	1	3	9	2	2	1	1	1	2012-09-08	58	1
357	4	2	1	2	1	2	4	1	1	1	3	1	1	1	3	6	2	2	2	1	1	2010-09-01	38	1
358	4	3	2	2	2	1	1	2	2	1	2	2	1	1	2	1	1	2	2	2	3	2015-10-23	99	1
359	1	3	2	2	2	1	1	2	1	1	1	2	1	1	1	2	2	2	2	2	4	2015-09-01	99	0
360	2	1	1	1	1	2	3	1	2	1	4	1	1	1	2	1	1	1	1	1	3	2016-02-08	103	0
361	4	3	2	2	2	1	1	1	1	1	1	2	1	1	1	2	2	2	2	2	4	2016-02-02	104	0
362	4	3	2	2	2	2	4	3	2	1	1	1	1	1	2	4	2	2	2	2	2	2009-07-22	23	1
363	4	3	2	2	2	1	1	1	1	1	1	2	1	1	1	7	2	2	2	2	4	2016-02-02	104	0
364	1	3	2	2	2	1	1	1	1	1	3	2	2	1	1	3	2	2	2	2	4	2015-09-01	100	0
365	4	3	2	2	2	2	2	1	1	1	4	1	1	1	1	1	1	1	2	2	4	2016-02-02	97	0
366	4	3	2	2	2	1	1	1	1	1	1	2	1	1	1	3	2	2	2	2	4	2016-02-02	104	0
367	1	3	2	2	2	2	5	3	1	1	1	2	2	1	3	3	2	2	2	2	3	2014-01-08	78	1
368	2	1	1	1	1	2	3	1	2	1	4	2	1	1	1	3	2	1	1	2	4	2016-02-08	97	0
369	1	1	1	1	1	2	3	3	2	1	4	1	1	1	3	1	1	1	1	2	2	2013-02-28	65	1
370	1	2	1	2	1	2	3	1	2	1	4	1	1	1	1	3	2	1	2	1	2	2012-11-03	63	1
371	4	1	1	2	1	2	2	1	2	1	3	1	1	1	1	1	1	2	1	2	3	2010-05-13	32	1
372	1	1	1	1	1	2	2	1	1	1	4	1	1	1	1	4	2	1	1	2	4	2015-09-01	96	0
373	4	3	2	2	2	2	5	2	2	1	1	2	1	1	2	3	2	2	2	2	3	2011-05-12	43	1
374	4	2	2	2	1	2	2	2	2	1	1	1	1	1	2	1	1	2	2	2	3	2009-09-22	26	1
375	4	3	2	2	2	2	4	2	2	1	1	1	1	1	3	11	2	2	2	2	3	2011-05-02	46	1
376	1	3	2	2	2	1	1	1	1	1	1	2	1	1	1	9	2	2	2	2	4	2015-09-01	98	0
377	4	1	1	1	1	2	2	1	1	1	4	1	1	1	2	11	2	2	1	1	2	2016-02-03	100	0
378	4	2	2	2	1	1	1	1	1	1	1	2	1	1	1	3	2	2	2	2	3	2011-12-01	54	1
379	1	2	1	2	1	2	2	1	1	1	4	1	1	1	1	8	2	2	2	2	1	2013-05-21	69	1
380	4	1	1	1	1	1	1	1	1	1	3	2	1	1	1	9	2	2	1	2	2	2011-09-14	48	1
381	4	2	1	2	1	2	4	1	1	1	4	1	1	2	1	12	2	2	2	1	3	2016-02-03	103	0
382	3	1	1	1	1	2	2	3	1	1	3	1	1	1	3	1	1	2	1	2	4	2016-02-08	101	0
383	4	3	2	2	2	1	1	1	1	1	1	2	1	1	1	8	2	2	2	2	3	2010-02-24	33	1
384	4	2	2	2	1	2	3	1	1	1	3	1	1	1	2	7	2	2	2	2	4	2016-02-03	104	0
385	4	3	2	2	2	1	1	1	1	1	1	2	1	1	1	5	2	2	2	2	4	2016-02-03	103	0
386	4	1	1	1	1	2	4	3	2	1	1	1	1	1	2	6	2	2	1	2	1	2011-06-01	44	1
387	1	2	1	2	1	2	3	1	2	1	2	1	1	1	1	11	2	1	2	2	4	2015-09-01	95	0
388	4	1	1	2	1	2	3	1	1	1	4	1	1	1	1	1	1	2	1	1	1	2016-02-03	103	0
389	1	1	1	1	1	2	2	1	2	1	4	1	1	1	1	7	2	2	1	1	3	2015-09-01	96	0
390	4	1	1	2	1	2	2	1	2	1	4	1	1	1	1	9	2	1	1	2	2	2011-06-30	44	1
391	4	1	1	1	1	1	1	1	2	1	4	2	1	1	1	1	1	2	1	2	3	2011-06-26	44	1
392	4	3	2	2	2	2	3	1	2	1	4	1	1	1	1	3	2	1	2	2	4	2016-02-03	101	0
393	1	3	2	2	2	2	2	2	2	1	1	2	2	1	2	1	1	2	2	2	1	2011-03-01	41	1
394	1	2	1	2	1	2	4	3	2	1	2	1	1	1	3	1	1	2	2	2	1	2013-05-15	66	1
395	4	1	1	1	1	2	2	1	1	1	4	1	1	2	1	6	2	2	1	2	1	2013-09-01	70	1
396	1	3	2	2	2	2	5	3	2	1	2	1	2	1	3	5	2	2	2	2	4	2015-09-01	94	0
397	2	1	1	1	1	2	3	1	2	1	3	1	1	1	3	12	2	2	1	1	1	2016-02-08	99	0
398	2	1	1	1	1	2	3	1	2	1	4	2	1	1	2	1	1	1	1	1	2	2012-05-07	57	1
399	4	1	1	1	1	2	3	1	1	1	4	1	1	1	1	3	2	2	1	1	1	2010-04-09	33	1
400	4	2	2	2	1	1	1	1	1	1	2	2	1	1	1	6	2	2	2	2	1	2010-10-11	40	1
401	4	3	2	2	2	1	1	1	1	1	1	2	1	1	1	4	2	2	2	2	4	2016-02-03	99	0
402	2	2	1	2	1	2	2	1	1	1	3	1	1	1	1	9	2	2	2	2	1	2011-05-24	45	1
403	4	3	2	2	2	1	1	1	1	1	1	2	2	1	1	7	2	2	2	2	4	2016-02-03	103	0
404	4	3	2	2	2	1	1	1	1	1	1	2	1	1	1	10	2	2	2	2	4	2016-02-03	103	0
405	1	1	1	2	1	2	3	1	2	1	4	1	1	1	1	7	2	2	1	1	1	2013-10-12	73	1
406	1	3	2	2	2	2	5	3	2	1	1	2	1	1	2	5	2	2	2	2	4	2015-09-01	95	0
407	1	3	2	2	2	1	1	1	1	1	1	2	1	1	1	5	2	2	2	2	4	2015-09-01	98	0
408	1	1	1	1	1	2	2	1	1	1	4	1	1	1	1	12	2	2	1	2	2	2013-05-09	64	1
409	1	2	2	2	1	2	5	3	2	1	1	2	1	1	2	1	1	2	2	2	3	2010-05-29	35	1
410	1	1	1	1	1	2	3	1	2	1	4	1	1	1	1	2	2	2	1	2	1	2012-03-15	54	1
411	4	3	2	2	2	1	1	1	1	1	1	2	2	1	1	2	2	2	2	2	4	2016-02-03	103	0
412	4	1	1	2	1	2	3	1	2	1	4	1	2	1	1	1	1	2	1	1	1	2012-09-04	57	1
413	4	3	2	2	2	2	5	2	2	1	1	2	1	1	3	5	2	2	2	2	3	2011-05-24	43	1
414	1	2	2	2	1	2	2	1	1	1	4	1	1	1	1	10	2	1	2	2	4	2015-09-01	96	0
415	4	1	1	1	1	2	3	1	2	1	4	1	1	1	2	1	1	2	1	1	1	2010-06-05	32	1
416	1	1	1	1	1	2	4	1	2	1	4	1	1	1	3	12	2	2	1	2	3	2012-09-25	59	1
417	4	3	2	2	2	2	4	2	2	1	2	1	1	1	3	11	2	1	2	2	4	2016-02-03	100	0
418	1	1	1	2	1	2	4	1	2	1	4	1	1	1	3	3	2	2	1	1	2	2010-01-28	30	1
419	4	3	2	2	2	2	5	3	2	1	1	2	1	1	2	7	2	2	2	2	3	2010-12-10	39	1
420	4	3	2	2	2	2	3	1	2	1	4	1	1	1	1	10	2	1	2	2	4	2016-02-03	98	0
421	1	1	1	2	1	2	3	1	2	1	4	2	1	1	1	12	2	2	1	1	1	2013-12-01	75	1
422	4	1	1	1	1	2	5	3	2	1	1	2	1	1	3	4	2	2	1	2	3	2015-03-01	90	1
423	4	2	1	2	1	2	5	3	2	1	1	1	1	2	2	5	2	1	2	2	4	2016-02-03	97	0
424	4	1	1	1	1	2	3	1	2	1	4	1	1	1	2	1	1	2	1	1	1	2011-02-10	40	1
425	4	3	2	2	2	1	1	1	1	1	1	2	1	1	1	6	2	2	2	2	4	2016-02-03	103	0
426	4	3	2	2	2	2	5	3	2	1	1	2	2	1	3	9	2	2	2	2	4	2016-02-03	97	0
427	4	3	2	2	2	1	1	3	2	1	1	2	2	1	1	2	2	2	2	2	3	2010-09-17	33	1
428	1	3	2	2	2	1	1	1	2	1	2	2	1	1	1	1	1	1	2	2	4	2015-09-01	94	0
429	4	3	2	2	2	2	5	3	2	1	1	2	1	1	3	12	2	2	2	2	4	2016-02-03	98	0
430	1	1	1	1	1	2	3	1	2	1	4	1	1	1	1	7	2	2	1	2	2	2012-01-27	53	1
431	4	2	1	2	1	2	3	1	1	2	3	2	1	1	3	6	2	2	2	2	2	2013-01-14	65	1
432	2	1	1	1	1	2	2	1	2	1	4	1	1	1	1	11	2	2	1	1	1	2012-06-08	56	1
433	1	3	2	2	2	1	1	1	1	1	1	2	1	1	1	7	2	2	2	2	3	2010-11-23	39	1
434	4	2	1	2	1	2	2	3	2	1	1	1	2	1	2	12	2	2	2	2	4	2016-02-03	98	0
435	4	3	2	2	2	1	1	1	1	1	1	2	2	1	1	2	2	2	2	2	4	2016-02-03	102	0
436	4	1	1	1	1	2	2	1	1	1	4	1	1	1	1	1	1	2	1	2	3	2015-02-11	86	1
437	5	3	2	2	2	2	5	2	2	1	4	2	1	1	2	5	2	1	2	2	3	2011-04-14	41	1
438	4	2	1	2	1	2	3	1	2	1	3	1	1	1	1	7	2	2	2	2	1	2012-09-21	60	1
439	4	3	2	2	2	1	1	1	1	1	2	2	1	1	1	6	2	2	2	2	4	2016-02-03	102	0
440	4	3	2	2	2	1	1	1	1	1	1	2	1	1	1	6	2	2	2	2	3	2010-07-16	35	1
441	4	1	1	1	1	2	3	1	2	1	4	1	1	1	1	6	2	2	1	2	2	2012-05-24	53	1
442	4	3	2	2	2	2	5	3	2	2	2	2	2	1	2	6	2	2	2	2	3	2011-12-07	49	1
443	4	2	2	2	1	2	3	1	2	1	3	1	1	2	1	11	2	2	2	2	2	2011-04-02	42	1
444	1	3	2	2	2	2	5	3	2	1	1	1	1	2	3	12	2	2	2	2	4	2015-09-01	93	0
445	4	1	1	1	1	2	2	1	1	1	4	1	1	1	1	2	2	2	1	2	1	2011-09-21	48	1
446	4	3	2	2	2	2	3	3	2	1	3	1	1	1	3	6	2	2	2	2	2	2012-12-19	62	1
447	4	1	1	1	1	2	3	1	1	2	3	1	1	2	3	6	2	2	1	2	3	2012-11-01	59	1
448	4	1	1	1	1	2	3	1	1	2	3	2	1	1	1	6	2	2	1	1	1	2011-05-25	44	1
449	4	3	2	2	2	2	2	3	2	1	1	1	1	1	2	1	1	2	2	2	3	2014-05-22	80	1
450	1	3	2	2	2	1	1	1	1	1	1	2	1	1	1	5	2	2	2	2	4	2015-09-01	96	0
451	4	2	2	2	1	1	1	1	2	1	4	2	1	1	1	2	2	2	2	2	4	2016-02-04	101	0
452	1	2	2	2	1	2	2	2	2	1	3	1	1	1	1	1	1	2	2	2	3	2014-03-29	77	1
453	4	3	2	2	2	2	5	3	2	1	1	2	1	1	3	4	2	2	2	2	1	2013-08-22	72	1
454	1	2	1	2	1	2	2	1	1	1	4	1	1	1	1	8	2	1	2	2	4	2015-09-01	92	0
455	4	3	2	2	2	2	2	3	2	1	1	1	1	1	2	12	2	2	2	2	1	2013-06-15	66	1
456	4	3	2	2	2	1	1	1	2	1	1	2	1	1	2	11	2	2	2	2	4	2016-02-04	102	0
457	4	3	2	2	2	2	3	3	2	1	2	1	1	1	3	4	2	2	2	2	2	2014-06-28	78	1
458	1	2	2	2	1	1	1	1	2	1	1	2	1	1	1	2	2	2	2	2	1	2011-01-19	40	1
459	1	3	2	2	2	1	1	1	1	1	1	2	1	1	1	2	2	2	2	2	4	2015-09-01	97	0
460	1	1	1	1	1	2	2	1	1	1	4	1	1	1	1	10	2	1	1	1	1	2015-09-01	97	0
461	4	2	1	2	1	2	3	1	2	1	3	1	1	2	1	8	2	2	2	2	1	2013-02-20	64	1
462	4	3	2	2	2	2	3	3	2	1	2	1	1	1	2	3	2	2	2	2	2	2013-01-02	61	1
463	1	2	1	2	1	2	3	1	1	1	3	1	1	1	2	5	2	2	2	1	1	2011-11-22	50	1
464	4	3	2	2	2	2	2	1	2	2	3	1	1	1	1	6	2	2	2	2	3	2013-07-26	69	1
465	4	3	2	2	2	1	1	1	1	1	1	2	2	1	1	6	2	2	2	2	4	2016-02-04	101	0
466	4	3	2	2	2	2	5	3	2	1	1	2	1	1	1	3	2	2	2	2	4	2016-02-04	102	0
467	4	3	2	2	2	2	5	3	2	1	1	2	1	1	1	3	2	2	2	2	4	2016-02-04	101	0
468	1	1	1	2	1	2	4	3	2	1	1	1	1	2	3	2	2	2	1	2	2	2012-05-01	53	1
469	1	2	1	2	1	2	3	1	2	1	4	1	1	1	1	9	2	2	2	2	1	2013-01-22	64	1
470	4	1	1	1	1	2	2	2	2	1	3	1	1	1	1	7	2	2	1	2	4	2016-02-04	99	0
471	1	2	2	2	1	1	1	3	2	2	1	2	1	1	1	10	2	2	2	2	3	2010-10-04	34	1
472	4	1	1	1	1	2	3	1	2	1	4	1	1	1	1	10	2	2	1	2	4	2016-02-04	99	0
473	1	1	1	1	1	2	2	1	2	1	3	1	1	1	2	8	2	2	1	2	4	2015-09-01	93	0
474	4	3	2	2	2	1	1	1	1	1	1	2	1	1	1	6	2	2	2	2	3	2011-10-06	49	1
475	4	3	2	2	2	2	5	2	2	1	1	1	1	1	3	5	2	2	2	2	4	2016-02-04	98	0
476	1	3	2	2	2	2	3	3	2	1	2	1	1	1	2	4	2	1	2	2	2	2013-12-17	74	1
477	1	3	2	2	2	2	5	2	2	1	1	1	1	1	2	7	2	2	2	2	3	2009-08-19	23	1
478	1	1	1	2	1	2	2	1	2	1	4	1	1	1	1	4	2	2	1	1	1	2010-03-16	29	1
479	1	2	1	2	1	2	3	1	2	1	4	1	1	1	3	7	2	2	2	1	1	2014-09-29	84	1
480	1	3	2	2	2	2	5	3	2	1	1	2	1	1	3	1	1	2	2	2	3	2010-05-01	30	1
481	4	1	1	1	1	2	2	1	1	1	4	1	1	1	2	1	1	2	1	1	2	2013-08-13	69	1
482	4	1	1	1	1	2	3	1	1	1	4	1	1	1	3	4	2	2	1	1	1	2013-11-01	73	1
483	1	3	2	2	2	1	1	1	2	1	2	2	1	1	1	5	2	2	2	2	3	2012-01-30	50	1
484	4	3	2	2	2	2	4	3	2	1	1	2	1	1	3	4	2	1	2	2	4	2016-02-04	100	0
485	4	1	1	1	1	2	3	1	1	1	4	1	1	1	2	1	1	2	1	1	2	2013-08-07	69	1
486	4	3	2	2	2	2	4	1	2	1	4	1	1	1	3	3	2	2	2	2	1	2011-05-06	44	1
487	4	1	1	1	1	2	3	1	1	1	4	1	1	1	1	4	2	2	1	1	1	2012-03-24	51	1
488	4	3	2	2	2	1	1	2	2	1	1	2	1	1	2	1	1	2	2	2	4	2016-02-04	100	0
489	1	1	1	1	1	2	3	1	2	1	3	1	1	1	1	12	2	2	1	1	1	2010-04-02	27	1
490	4	1	1	1	1	2	4	1	2	1	4	1	1	1	3	3	2	1	1	1	3	2016-02-04	97	0
491	4	1	1	1	1	2	3	1	1	1	4	1	1	1	1	1	1	1	1	1	2	2012-07-11	54	1
492	1	2	1	2	1	2	2	1	1	1	3	2	1	1	1	11	2	2	2	2	4	2015-09-01	96	0
493	4	1	1	1	1	2	3	1	1	1	4	1	1	1	1	1	1	2	1	1	2	2011-02-08	38	1
494	4	2	1	2	1	1	1	1	1	1	1	2	2	1	3	7	2	2	2	2	4	2016-02-04	101	0
495	1	1	1	1	1	2	2	1	2	1	3	1	1	1	1	6	2	2	1	1	1	2010-10-26	35	1
496	4	1	1	2	1	2	3	1	2	1	3	1	1	1	1	2	2	2	1	1	2	2010-07-28	33	1
497	1	3	2	2	2	2	3	3	1	1	2	1	1	1	3	1	1	1	2	2	1	2015-07-17	93	1
498	4	3	2	2	2	2	5	3	2	1	1	2	1	1	1	2	2	2	2	2	4	2016-02-04	100	0
499	4	3	2	2	2	1	1	1	1	1	1	2	2	1	1	8	2	2	2	2	4	2016-02-04	101	0
500	4	2	1	2	1	2	2	1	1	1	3	2	2	1	1	4	2	2	2	2	3	2010-11-10	38	1
501	4	3	2	2	2	2	4	3	2	1	2	1	1	1	3	3	2	2	2	2	4	2016-02-04	97	0
502	1	2	1	2	1	2	3	1	2	1	4	1	1	1	1	1	1	1	2	2	2	2013-09-24	69	1
503	1	2	1	2	1	2	3	1	1	1	4	1	1	1	1	9	2	1	2	1	3	2015-09-01	92	0
504	4	3	2	2	2	2	4	3	2	1	1	2	1	1	2	11	2	2	2	2	4	2016-02-04	99	0
505	4	3	2	2	2	2	5	3	2	1	1	2	1	1	3	12	2	2	2	2	3	2013-03-01	64	1
506	1	1	1	1	1	2	3	1	2	2	4	1	1	1	1	1	1	1	1	2	4	2015-09-01	92	0
507	4	3	2	2	2	2	5	3	2	1	1	2	1	1	2	1	1	2	2	2	4	2016-02-04	97	0
508	1	3	2	2	2	2	3	1	2	1	4	1	1	1	3	4	2	2	2	2	1	2011-04-22	42	1
509	4	2	1	2	1	2	2	2	2	1	2	1	1	1	2	1	1	2	2	2	3	2010-04-15	29	1
510	4	1	1	1	1	2	3	1	1	1	4	1	1	2	2	2	2	1	1	2	3	2011-08-01	46	1
511	1	1	1	2	1	2	4	2	2	1	1	1	1	1	3	1	1	1	1	2	4	2015-09-01	92	0
512	1	2	1	2	1	2	2	1	2	1	3	1	2	1	1	3	2	2	2	2	4	2015-09-01	93	0
513	1	2	1	2	1	2	5	1	1	1	1	2	1	1	3	8	2	2	2	1	3	2015-05-26	89	1
514	4	2	1	2	1	2	2	1	2	1	3	1	1	1	1	3	2	2	2	1	1	2016-02-04	98	0
515	1	3	2	2	2	1	1	1	1	1	1	2	1	1	1	3	2	2	2	2	3	2013-08-14	71	1
516	1	1	1	2	1	2	5	3	2	1	1	2	1	1	2	4	2	2	1	2	1	2009-04-09	17	1
517	4	3	2	2	2	1	1	1	1	1	1	2	1	1	1	1	1	2	2	2	4	2016-02-04	100	0
518	2	1	1	2	1	2	4	1	2	1	4	1	1	1	3	9	2	2	1	1	1	2013-01-17	62	1
519	1	3	2	2	2	1	1	1	1	1	1	2	1	1	1	4	2	2	2	2	4	2015-09-01	95	0
520	4	1	1	1	1	2	3	1	1	1	4	1	1	1	1	1	1	1	1	2	4	2016-02-04	98	0
521	1	3	2	2	2	2	5	3	2	1	1	2	1	1	2	2	2	2	2	2	1	2012-07-22	55	1
522	4	3	2	2	2	2	2	3	2	1	1	1	3	1	2	9	2	2	2	2	1	2009-05-01	16	1
523	4	3	2	2	2	1	1	1	1	1	1	2	1	1	1	5	2	2	2	2	4	2016-02-04	100	0
524	4	3	2	2	2	2	4	3	2	1	1	1	1	1	3	11	2	2	2	2	4	2016-02-04	97	0
525	1	2	1	2	1	2	3	1	2	1	4	1	1	1	3	12	2	2	2	1	3	2012-02-01	52	1
526	4	3	2	2	2	2	4	3	2	1	1	1	1	1	3	10	2	2	2	2	4	2016-02-04	97	0
527	4	3	2	2	2	1	1	1	1	1	1	2	1	1	1	6	2	2	2	2	3	2010-07-16	33	1
528	1	3	2	2	2	2	5	3	2	1	1	2	1	1	2	12	2	2	2	2	3	2012-10-03	58	1
529	4	2	1	2	1	2	3	1	2	1	4	1	1	1	1	1	1	2	2	1	2	2013-08-12	68	1
530	4	3	2	2	2	1	1	1	1	1	1	2	1	1	1	10	2	2	2	2	4	2016-02-04	100	0
531	4	3	2	2	2	2	3	1	1	1	3	1	1	1	1	11	2	1	2	2	4	2016-02-04	98	0
532	4	1	1	1	1	2	5	2	2	1	1	2	1	1	2	3	2	2	1	2	4	2016-02-04	98	0
533	1	1	1	1	1	2	3	1	2	1	4	1	1	1	1	6	2	2	1	1	1	2011-05-18	40	1
534	4	3	2	2	2	1	1	1	1	1	1	2	1	1	1	6	2	2	2	2	3	2013-09-01	70	1
535	4	3	2	2	2	1	1	1	1	1	1	2	1	1	1	6	2	1	2	2	3	2010-07-16	31	1
536	1	3	2	2	2	2	5	3	1	1	1	2	1	1	1	5	2	2	2	2	3	2010-02-08	27	1
537	4	3	2	2	2	1	1	1	1	1	1	2	1	1	1	3	2	2	2	2	4	2016-02-04	99	0
538	4	3	2	2	2	1	1	1	1	1	1	2	1	1	1	4	2	2	2	2	4	2016-02-04	99	0
539	1	3	2	2	2	2	5	1	1	1	1	2	2	1	2	5	2	2	2	2	3	2010-02-10	25	1
540	4	3	2	2	2	1	1	1	2	1	1	2	1	1	1	5	2	2	2	2	3	2012-07-07	57	1
541	1	3	2	2	2	1	1	1	1	1	1	2	1	1	1	8	2	2	2	2	3	2013-01-18	63	1
542	4	3	2	2	2	1	1	1	1	1	1	2	1	1	1	2	2	2	2	2	4	2016-02-04	99	0
543	3	3	2	2	2	2	5	2	2	1	1	1	2	1	2	12	2	1	2	2	4	2016-02-08	98	0
544	4	3	2	2	2	1	1	1	1	1	1	2	1	1	1	12	2	2	2	2	3	2010-09-01	34	1
545	1	1	1	2	1	2	2	1	2	1	1	2	1	1	1	12	2	2	1	2	4	2015-09-01	93	0
546	4	2	1	2	1	2	2	1	2	1	4	2	1	1	1	8	2	2	2	1	1	2010-05-13	29	1
547	1	1	1	1	1	2	3	1	2	1	4	1	1	1	1	3	2	2	1	1	1	2010-09-16	32	1
548	4	2	1	2	1	2	3	1	1	1	3	1	1	1	1	1	1	1	2	2	4	2016-02-04	97	0
549	1	1	1	1	1	2	4	1	1	1	4	1	1	1	3	8	2	2	1	1	1	2011-03-24	39	1
550	4	2	1	2	1	2	2	1	1	1	4	1	1	1	1	8	2	2	2	2	2	2011-11-16	47	1
551	4	1	1	1	1	2	2	1	1	1	4	1	1	1	1	2	2	2	1	1	3	2012-08-23	56	1
552	1	3	2	2	2	1	1	1	1	1	1	2	1	1	1	4	2	2	2	2	4	2015-09-01	94	0
553	4	3	2	2	2	2	5	3	2	1	1	1	1	2	3	2	2	2	2	2	1	2013-01-09	61	1
554	4	1	1	1	1	2	2	1	1	1	4	1	1	1	2	1	1	2	1	1	1	2012-11-12	58	1
555	4	3	2	2	2	2	5	3	2	1	1	2	1	1	1	2	2	2	2	2	1	2011-11-11	47	1
556	4	3	2	2	2	1	1	1	1	1	1	2	1	1	1	3	2	2	2	2	4	2016-02-04	99	0
557	1	1	1	1	1	2	2	1	2	1	3	1	1	1	1	6	2	2	1	1	1	2011-01-01	36	1
558	4	2	1	2	1	2	3	1	2	1	4	1	1	1	1	2	2	2	2	1	3	2012-04-27	52	1
559	4	2	1	2	1	2	2	1	1	1	1	2	2	1	1	2	2	2	2	1	3	2016-02-04	98	0
560	4	3	2	2	2	2	3	1	1	1	3	1	1	1	2	1	1	1	2	2	4	2016-02-04	97	0
561	1	2	1	2	1	2	3	1	1	1	4	1	1	1	1	2	2	2	2	2	4	2015-09-01	92	0
562	4	3	2	2	2	1	1	1	1	1	1	2	1	1	1	5	2	2	2	2	4	2015-12-09	97	0
563	1	3	2	2	2	2	2	2	2	1	1	1	1	1	3	1	1	2	2	2	4	2015-09-01	92	0
564	4	3	2	2	2	1	1	1	1	1	1	2	1	1	1	1	1	2	2	2	4	2016-02-04	98	0
565	4	3	2	2	2	2	5	3	2	1	1	1	1	1	2	1	1	2	2	2	3	2011-01-06	36	1
566	4	3	2	2	2	2	2	3	2	1	1	1	1	1	2	1	1	2	2	2	3	2015-01-12	85	1
567	4	3	2	2	2	1	1	1	1	1	1	2	1	1	1	2	2	2	2	2	4	2016-02-04	98	0
568	4	3	2	2	2	1	1	1	1	1	1	2	1	1	1	3	2	2	2	2	4	2016-02-04	98	0
569	4	3	2	2	2	1	1	1	1	1	1	2	1	1	1	11	2	2	2	2	3	2013-03-20	63	1
570	4	3	2	2	2	1	1	1	1	1	1	2	1	1	1	7	2	2	2	2	4	2016-02-04	97	0
571	4	3	2	2	2	1	1	1	1	1	1	2	1	1	1	2	2	2	2	2	4	2016-02-04	97	0
572	4	3	2	2	2	1	1	1	1	1	1	2	1	1	1	7	2	2	2	2	4	2016-02-04	97	0
573	2	3	2	2	2	1	1	1	1	1	1	2	1	1	1	2	2	1	2	2	4	2016-02-08	97	0
574	4	3	2	2	2	1	1	1	1	1	1	2	1	1	1	2	2	2	2	2	4	2016-02-04	97	0
