# Supplementary material for: Non-Publication Is Common among Phase 1, Single-Center, Not Prospectively Registered, or Early Terminated Clinical Drug Trials
Source: PLoS One. 2016 Dec 14;11(12):e0167709. doi: 10.1371/journal.pone.0167709 (PMC5156378; doi:10.1371/journal.pone.0167709)
Supplement: S3 File — Based on our initial search, we sent 4 different questionnaires, depending on whether or not we found that the trial was published, and depending on whether or not we had information on the end of trial (completed as planned or terminated early). (ZIP) [file pone.0167709.s007.zip]

Archive with 4 entries (4 files):
- Survey2_ENGLISH.pdf
- Survey3_ENGLISH.pdf
- Survey4_ENGLISH.pdf
- Survey1_ENGLISH.pdf
