# Supplementary material for: Non-Publication Is Common among Phase 1, Single-Center, Not Prospectively Registered, or Early Terminated Clinical Drug Trials
Source: PLOS journal article supplement (doi:10.1371/journal.pone.0167709), 2016-12-14
Supplement: S7 (10.1371/journal.pone.0167709.s007) [file journal.pone.0167709.s007]

# Questionnaire of research project 'Better Use of Files'

This is the online questionnaire of the research project 'Better Use of Files, of which you were informed by email

There are 16 questions in this survey

## Trial identification

1 [1]

What is the NL-number of the trial?

Please fill out the NL-number exactly as it is noted in the email, including the 2 dots.  
Example: NL12345.678.90

Investigators who received emails for more than one trial, please complete a separate survey for each trial \*

Please check the format of your answer.

Please write your answer here:

2 [8]What was the date that inclusion started? \*

Please write your answer(s) here:

In the Netherlands:

In case of an international multicenter trial: for the whole trial:

3 [4]Has the trial prospectively been registered at a public register, e.g. [www.clinicaltrials.gov](http://www.clinicaltrials.gov) or ISRCTN? By prospectively we mean before recruitment of the first participant. \*

Please choose **only one** of the following:

☐ Yes

☐ No

4 [6]Note the trial identification number for the register at issue (e.g. NCT12345678) \*

Only answer this question if the following conditions are met:

Answer was 'Yes' at question '3 [4]' (Has the trial prospectively been registered at a public register, e.g. www.clinicaltrials.gov or ISRCTN? By prospectively we mean before recruitment of the first participant. )

Please write your answer here:

Start of the trial

These questions address whether the trial was started after approval of the medical research ethics committee

5 [1]Are there any participants included in this trial? \*

Please choose **only one** of the following:

- ☐ Yes, also in the Netherlands
- ☐ Not in the Netherlands, but in other countries
- ☐ No, the trial has not started at all

6 [2]Why has inclusion for the trial not started in the Netherlands? \*

Only answer this question if the following conditions are met:

Answer was 'Not in the Netherlands, but in other countries' at question '5 [1]' (Are there any participants included in this trial?)

Please choose all that apply and provide a comment:

☐ There were already sufficient participants included in other countries

☐ Other:

In the window on the right you can give further explanation, if desired

7 [5]Why has the trial not started at all? \*

Only answer this question if the following conditions are met:

Answer was 'No, the trial has not started at all' at question '5 [1]' (Are there any participants included in this trial?)

Please write your answer here:

Progress of the trial

These questions address the progress of the trial

8 [1]How many participants were included in the trial?

Only answer this question if the following conditions are met:

Answer was 'Yes, also in the Netherlands' or 'Not in the Netherlands, but in other countries' at question '5 [1]' (Are there any participants included in this trial?)

Please write your answer(s) here:

Number of participants included in the Netherlands:

If the trial is an international multicenter trial: number  
of participants included in whole trial:

9 [3]How was the trial completed? \*

Only answer this question if the following conditions are met:

Answer was 'Yes, also in the Netherlands' or 'Not in the Netherlands, but in other countries' at question '5 [1]' (Are there any participants included in this trial?)

Please choose **only one** of the following:

- ☐ Completed as planned
- ☐ Preliminary terminated

10 [4]What was the reason for the preliminary termination of the trial? \*

Only answer this question if the following conditions are met:

Answer was 'Not in the Netherlands, but in other countries' or 'Yes, also in the Netherlands' at question '5 [1]' (Are there any participants included in this trial?) *and* Answer was 'Preliminary terminated' at question '9 [3]' (How was the trial completed?)

Please choose all that apply and provide a comment:

- ☐ Insufficient participants
- ☐ Adverse events
- ☐ Interim analysis shows superiority
- ☐ Interim analysis shows futility
- ☐ Stopped on advice of the Data Monitoring Board
- ☐ Other:

Multiple answers can be selected and explanation may be provided in the boxes on the right

11 [5]What was the date of the last visit of the last patient in the trial? Please input the date in the following format: dd-mm-yyyy, e.g. 01-01-2010 \*

Only answer this question if the following conditions are met:

Answer was 'Not in the Netherlands, but in other countries' or 'Yes, also in the Netherlands' at question '5 [1]' (Are there any participants included in this trial?)

Please write your answer(s) here:

In the Netherlands:

If the trial is an international multicenter trial: for the  
whole trial:

For example: 01-01-2010

## Publication of the trial

The final set of questions addresses the publication of the trial. By publication we mean publishing the methods and results of the trial in a peer-reviewed journal

### 12 [1]

**We may have identified a publication of the trial. Is the trial indeed published as peer-reviewed article?**

\*

**Only answer this question if the following conditions are met:**

Answer was 'Yes, also in the Netherlands' or 'Not in the Netherlands, but in other countries' at question '5 [1]' (Are there any participants included in this trial?)

Please choose **only one** of the following:

- ☐ Yes
- ☐ No

### 13 [2]

**Please note the title(s), journal(s), journal edition(s), and publication date(s) of the article(s)**

\*

**Only answer this question if the following conditions are met:**

Answer was 'Yes, also in the Netherlands' or 'Not in the Netherlands, but in other countries' at question '5 [1]' (Are there any participants included in this trial?) *and* Answer was 'Yes' at question '12 [1]' ( We may have identified a publication of the trial. Is the trial indeed published as peer-reviewed article ? )

Please write your answer here:

14 [3]

Why has the trial not been published?

\*

Only answer this question if the following conditions are met:

Answer was 'Yes, also in the Netherlands' or 'Not in the Netherlands, but in other countries' at question '5 [1]' (Are there any participants included in this trial?) and Answer was 'No' at question '12 [1]' ( We may have identified a publication of the trial. Is the trial indeed published as peer-reviewed article ? )

Please choose all that apply and provide a comment:

|                                                                                                        |  |
|--------------------------------------------------------------------------------------------------------|--|
| <input type="checkbox"/> Other priorities                                                              |  |
| <input type="checkbox"/> Resultaten niet statistisch significant Results not statistically significant |  |
| <input type="checkbox"/> Resultaten niet klinisch relevant Results not clinically relevant             |  |
|                                                                                                        |  |

☐ Manuscript is afgewezen door tijdschrift(en)

Manuscript was rejected by journal(s)

☐ Other reasons (please specify):

15 [4]

Are the results of the trial reported in a different way than in a peer reviewed journal?

Only answer this question if the following conditions are met:

Answer was 'Not in the Netherlands, but in other countries' or 'Yes, also in the Netherlands' at question '5 [1]' (Are there any participants included in this trial?)

Please choose **only one** of the following:

☐ Yes (Please specify where, e.g. results reported on clinicaltrials.gov + registration number)

☐ No

Make a comment on your choice here:

Einde vragenlijst

16 [3]Thank you for completing the questionnaire. You can add any additional comments here. Please do not forget to click on the button 'Submit' at the bottom of this page.

Please write your answer here:

Many thanks for your collaboration! Your answers have been saved. Please do not fill out the questionnaire again.

In case of unforeseen errors or system malfunction, please contact Sander van den Bogert: [s.van.den.bogert@ccmo.nl](mailto:s.van.den.bogert@ccmo.nl)

Submit your survey.  
Thank you for completing this survey.
