# Supplementary material for: Non-Publication Is Common among Phase 1, Single-Center, Not Prospectively Registered, or Early Terminated Clinical Drug Trials
Source: PLOS journal article supplement (doi:10.1371/journal.pone.0167709), 2016-12-14
Supplement: S7 (10.1371/journal.pone.0167709.s007) [file journal.pone.0167709.s007]

# Questionnaire of research project 'Better Use of Files'

This is the online questionnaire of the research project 'Better Use of Files, of which you were informed by email

There are 9 questions in this survey

## Trial identification

1 [1]

What is the NL-number of the trial?

Please fill out the NL-number exactly as it is noted in the email, including the 2 dots.  
Example: NL12345.678.90

Investigators who received emails for more than one trial, please complete a separate survey for each trial \*

Please check the format of your answer.

Please write your answer here:

2 [8]What was the date that inclusion started? \*

Please write your answer(s) here:

In the Netherlands:

In case of an international multicenter trial: for the whole trial:

3 [4]Has the trial prospectively been registered at a public register, e.g. [www.clinicaltrials.gov](http://www.clinicaltrials.gov) or ISRCTN? By prospectively we mean before recruitment of the first participant. \*

Please choose **only one** of the following:

☐ Yes

☐ No

**4 [6]Note the trial identification number for the register at issue (e.g. NCT12345678) \***

**Only answer this question if the following conditions are met:**

Answer was 'Yes' at question '3 [4]' (Has the trial prospectively been registered at a public register, e.g. www.clinicaltrials.gov or ISRCTN? By prospectively we mean before recruitment of the first participant. )

Please write your answer here:

**Publication of the trial**

This set of questions addresses the publication of the trial. By publication we mean publishing the methods and results of the trial in a peer-reviewed journal

**5 [1]We hebben in Medline, Embase en Google Scholar geen publicatie van de studie kunnen vinden. Klopt het dat de studie (nog) niet als artikel is gepubliceerd? \***

Please choose **only one** of the following:

- ☐ No, the trial has been published in a peer-reviewed journal
- ☐ Yes, the trial has indeed not been published

**6 [2]**

**Please note the title(s), journal name(s), journal edition(s), and publication date(s) of the publication(s) \***

**Only answer this question if the following conditions are met:**

Answer was 'No, the trial has been published in a peer-reviewed journal' at question '5 [1]' (We hebben in Medline, Embase en Google Scholar geen publicatie van de studie kunnen vinden. Klopt het dat de studie (nog) niet als artikel is gepubliceerd? )

Please write your answer here:

7 [3]

Why has the trial not been published? \*

Only answer this question if the following conditions are met:

Answer was 'Yes, the trial has indeed not been published' at question '5 [1]' (We hebben in Medline, Embase en Google Scholar geen publicatie van de studie kunnen vinden. Klopt het dat de studie (nog) niet als artikel is gepubliceerd? )

Please choose all that apply and provide a comment:

|                                                                       |  |
|-----------------------------------------------------------------------|--|
| <input type="checkbox"/> Andere prioriteiten                          |  |
| <input type="checkbox"/> Resultaten niet statistisch significant      |  |
| <input type="checkbox"/> Resultaten niet klinisch relevant            |  |
| <input type="checkbox"/> Manuscript is afgewezen door tijdschrift(en) |  |
| <input type="checkbox"/> Andere reden(en):                            |  |

8 [4]Are the results of the trial reported in a different way than in a peer reviewed journal?

Please choose **only one** of the following:

- ☐ Yes (Please specify where, e.g. results reported on clinicaltrials.gov + registration number)
- ☐ No

Make a comment on your choice here:

Einde vragenlijst

9 [3]Thank you for completing the questionnaire. You can add any additional comments here. Please do not forget to click on the button 'Submit' at the bottom of this page.

Please write your answer here:

Many thanks for your collaboration! Your answers have been saved. Please do not fill out the questionnaire again.

In case of unforeseen errors or system malfunction, please contact Sander van den Bogert: [s.van.den.bogert@ccmo.nl](mailto:s.van.den.bogert@ccmo.nl)

Submit your survey.  
Thank you for completing this survey.
